# Supplementary material for: The Association between High Fat Diet around Gestation and Metabolic Syndrome-related Phenotypes in Rats: A Systematic Review and Meta-Analysis
Source: PubMed Central journal article supplement (PMC5506021; doi:10.1038/s41598-017-05344-7), 2017-07-11

# **SUPPLEMENTARY INFORMATION**

*for*

*The Association Between High Fat Diet around gestation and Metabolic Syndrome-related Phenotypes in Rats: A Systematic Review and Meta-Analysis*

*Mariana L Tellechea, PhD; Melisa F Mensegue, MD; Carlos J Pirola, PhD.*

**Table S1:** Summary of the included data (extended dataset), page 2

**Table S2:** Characteristics of the experimental diets, page 3

**Table S3:** Assessment of methodological quality, page 5

**Table S4:** Search Strategy for Pubmed, page 7

**Table S5:** Detailed technical description of the coding of extracted data and parameters, page 8

**Table S6:** List of excluded studies with reasons for exclusion, page 9

**Figure S1:** Timing of maternal dietary manipulations, page 12

**Figure S2:** Energy from fat and protein in experimental and control diets, page 14

**Figure S3:** Forest Plots for data on main dataset, page 16

**Figure S4:** Subgroup analyses for HDL-c, extended dataset, page 21

**Figure S5:** Subgroup analyses for main dataset, page 21

**Figure S6:** Meta-regression uncovering the potential influence of moderators, page 23

**Figure S7:** Funnel plots for the presence of data distribution asymmetry, page 30

**Supplementary Table S1: Summary of the included data (extended dataset).**

The data is split into eight subsets determined by outcome. N cohorts: total number of experimental groups identified for the purposes of our analysis. N data points: number of effect sizes. Abbreviations: N: number, NA: not available, W: Wistar, SD: Sprague Dawley, LE: Long Evans, PPP: Prepubertal/Pubertal, YA: Young Adult and A: Adult.

| Outcome                        |        | Body weight | Body fat | Leptin  | Glucose | Insulin | HDL-c   | Triglycerides | SBP      |
|--------------------------------|--------|-------------|----------|---------|---------|---------|---------|---------------|----------|
| N studies                      |        | 49          | 37       | 26      | 28      | 32      | 11      | 26            | 9        |
| N cohorts                      |        | 105         | 84       | 54      | 62      | 72      | 24      | 55            | 21       |
| N rats                         |        | 1589        | 1131     | 861     | 927     | 1019    | 316     | 776           | 204      |
| N data points                  |        | 75          | 63       | 43      | 50      | 52      | 21      | 44            | 14       |
| N (%) data points by sex       | male   | 47 (63)     | 42 (67)  | 24 (56) | 30 (60) | 32 (61) | 11 (52) | 24 (55)       | 6 (43)   |
|                                | female | 25 (33)     | 19 (30)  | 18 (42) | 19 (38) | 18 (35) | 9 (43)  | 18 (41)       | 8 (57)   |
|                                | both   | 3 (4)       | 2 (3)    | 1 (2)   | 1 (2)   | 2 (4)   | 1 (5)   | 1 (2)         | 0 (0)    |
|                                | NA     | 0 (0)       | 0 (0)    | 0 (0)   | 0 (0)   | 0 (0)   | 0 (0)   | 1 (2)         | 0 (0)    |
| N (%) data points by strain    | W      | 35 (47)     | 27 (43)  | 24 (56) | 21 (42) | 21 (40) | 8 (38)  | 17 (39)       | 0 (0)    |
|                                | SD     | 36 (48)     | 34 (54)  | 19 (44) | 26 (52) | 30 (58) | 13 (62) | 27 (61)       | 14 (100) |
|                                | LE     | 4 (5)       | 2 (3)    | 0 (0)   | 3 (6)   | 1 (2)   | 0 (0)   | 0 (0)         | 0 (0)    |
| N (%) data points by age stage | PPP    | 11 (14)     | 12 (19)  | 5 (12)  | 5 (10)  | 7 (13)  | 2 (10)  | 7 (16)        | 4 (29)   |
|                                | YA     | 56 (75)     | 43 (68)  | 32 (74) | 34 (68) | 35 (67) | 12 (57) | 27 (61)       | 7 (50)   |
|                                | A      | 8 (11)      | 8 (13)   | 6 (14)  | 11 (22) | 10 (19) | 7 (33)  | 10 (23)       | 3 (21)   |

**Supplementary Table S2:** Characteristics of the experimental diets of the studies included in extended dataset.

The data are grouped by main fat source and fat type: 1) animal (lard, butter, milk fat, mainly  $\omega$ -9 saturated and monounsaturated fatty acids), 2) mixed and 3) vegetal (high in saturated fatty acids: e.g. coconut and palm oils, monounsaturated: e.g. canola oil, and polyunsaturated: e.g.  $\omega$ -6 oils like safflower and corn oils, or  $\omega$ -3 oils like soybean oil). Abbreviations: comm: commercial, NA: not available. When the composition in %kcal was not available, it was calculated from the available data in %w/w or it was taken from data declared by manufacturer.

| Reference                                                                                                                                                             | fat_source | fat_exp (%kcal) | fat_exp-con (%kcal) | carb_exp-con (%kcal) | protein_exp-con (%kcal) | energy_exp (Kcal/g) | energy_exp-con (Kcal/g) | diet_type   |
|-----------------------------------------------------------------------------------------------------------------------------------------------------------------------|------------|-----------------|---------------------|----------------------|-------------------------|---------------------|-------------------------|-------------|
| Burgueño AL 2013                                                                                                                                                      | lard       | 68.0            | 48.8                | -49                  | -22.3                   | 5.8                 | 2.8                     | chow based  |
| Srinivasan M 2006                                                                                                                                                     | lard       | 60.3            | 48.5                | -51.4                | -5.8                    | 5.3                 | 2.1                     | comm.       |
| Tamashiro KL 2009                                                                                                                                                     | lard       | 60              | 43                  | -39.3                | -3.2                    | 5.2                 | 2.1                     | comm.       |
| Sun B 2012<br>Sun B 2013                                                                                                                                              | lard       | 60              | 46.5                | -36.6                | -9.8                    | 5.2                 | 1.9                     | comm.       |
| White CL, Bruce-Keller AJ 2009<br>White CL, Morrison CD 2009                                                                                                          | lard       | 60              | 50                  | -50                  | 0                       | 5.2                 | 1.4                     | comm.       |
| Sasaki A 2013                                                                                                                                                         | lard       | 60              | 46.5                | -38                  | -8.5                    | 5.2                 | 2.2                     | comm.       |
| Marco A 2014                                                                                                                                                          | lard       | 60              | 42.6                | -39.3                | -3.2                    | 5.2                 | 2.1                     | comm.       |
| Lecoutre S 2016                                                                                                                                                       | lard       | 60              | 50                  | -50                  | 0                       | 5.2                 | 1.4                     | comm.       |
| Ambrosetti V 2016                                                                                                                                                     | lard       | 60              | 47                  |                      |                         |                     |                         | comm.       |
| Guberman C 2013                                                                                                                                                       | lard       | 60              | 50                  | -50                  | 0                       | 5.2                 | 1.4                     | comm.       |
| Seet EL, Desai M 2015<br>Desai M, Ross MG 2014<br>Desai M, Ross MG 2015                                                                                               | lard       | 60              | 50                  | -50                  | 0                       | 5.1                 | 1.4                     | comm.       |
| Walker CD, Azeddine B 2008<br>Naef L, Walker CD 2008                                                                                                                  | lard       | 59.5            | 46.4                | -48.4                | -4.2                    | 4.5                 | 1.1                     | custom-made |
| Koukkou E 1998                                                                                                                                                        | lard       | 53.8            | 42.8                | -30.3                | -12.5                   | 5.0                 | 1.7                     | comm.       |
| Mendes-da-Silva C 2014                                                                                                                                                | lard       | 52              | 37.3                | -34.3                | -5.9                    | 4.1                 | 1.3                     | chow based  |
| Taylor PD, Poston L 2005<br>Khan IY, Poston L 2003                                                                                                                    | lard       | 48.8            | 35.6                | -28.6                | -7.0                    | 4.7                 | 1.1                     | chow based  |
| Khan IY 2004                                                                                                                                                          | lard       | 48.7            | 35.6                | -28.6                | -7.0                    | 4.7                 | 1.1                     | chow based  |
| Khan IY 2005                                                                                                                                                          | lard       | 51.6            | 37.2                | -28.6                | -8.3                    | 4.5                 | 1.2                     | chow based  |
| Armitage JA 2005                                                                                                                                                      | lard       | 47.4            | 33.7                | -26.4                | -7.4                    | 4.6                 | 1.1                     | chow based  |
| Eleftheriades M 2014                                                                                                                                                  | lard       | 46.7            | 34.5                | -35.3                | -15.5                   | 4.4                 | 1.6                     | chow based  |
| Vega CC, Zambrano E 2015<br>Bautista CJ, Zambrano E 2016<br>Rodríguez-González GL,<br>Zambrano E 2015<br>Zambrano E, Nathanielsz PW 2010<br>Santos M, Zambrano E 2015 | lard       | 45.9            | 34.7                | -27.7                | -2.8                    | 4.9                 | 0.9                     | NA          |
| Zhang X 2011                                                                                                                                                          | lard       | 45.9            | 30.2                | -29.1                | 0.4                     | 4.7                 | 0.9                     | comm.       |
| Page KC 2009                                                                                                                                                          | lard       | 45.7            | 35.6                | -35.2                | 0.3                     | 4.7                 | 0.9                     | comm.       |
| Howie GJ 2009<br>Howie GJ 2013                                                                                                                                        | lard       | 45.7            | 28.2                | -24.7                | -2.9                    | 4.7                 | 1.6                     | comm.       |
| Smith T 2014                                                                                                                                                          | lard       | 45.7            | 32.4                | -19.4                | -4.3                    | 4.7                 | 1.3                     | comm.       |
| Pereira TJ 2015                                                                                                                                                       | lard       | 45              | 35                  | -35.2                | 0.3                     | 4.7                 | 0.9                     | comm.       |
| Cordero P 2015                                                                                                                                                        | lard       | 45              | 32                  | -32                  | 0                       | 4.7                 | 1.8                     | comm.       |

|                                                                      |                                              |      |      |       |       |     |     |                                 |
|----------------------------------------------------------------------|----------------------------------------------|------|------|-------|-------|-----|-----|---------------------------------|
| Sloboda DM 2009                                                      | lard                                         | 45   | 31.8 | -19.4 | -1.2  | 4.7 | 1.3 | comm.                           |
| Tsoulis MW 2016                                                      | lard                                         | 45   | 31   | -19.8 | -11.7 | 4.7 | 1.7 | comm.                           |
| Gray C, Reynolds CM 2015                                             | lard                                         | 45   | 35.0 | -35.2 | 0.3   | 4.7 | 0.9 | comm.l                          |
| Reynolds CM 2015                                                     | lard                                         | 45   | 35   | -35   | 0     | 4.7 | 0.9 | comm.                           |
| Pileggi CA 2016                                                      | lard                                         | 45   | 35   | -35   | 0     | 4.7 | 0.9 | comm.                           |
| Song Y 2015                                                          | lard                                         | 45   | 35.0 | -35.2 | 0.3   | 4.7 | 0.9 | comm.                           |
| Latouche C 2014                                                      | lard                                         | 45   | 28.7 | -28.6 | -0.4  | 4.7 | 0.8 | comm.                           |
| Yang KF 2012                                                         | lard                                         | 45   | 29   | -29   | 0     | 4.0 | 0   | NA                              |
| Ghosh P 2001                                                         | lard                                         | 43.3 | 32.3 | -22.8 | -9.5  | 4.2 | 0.9 | comm.                           |
| Miotto PM, Ward WE 2013<br>MacPherson RE, Ward WE,<br>Peters SJ 2015 | lard                                         | 41   | 23.8 | -24   | 0.3   | 4.4 | 0.6 | custom-<br>made                 |
| Hanafi MY 2016                                                       | lard                                         | 13.0 | 2.8  | -16.0 | -2.4  | 4.7 | 0.9 | NA                              |
| Mazzucco MB 2016                                                     | butter                                       | 48.5 | 35.7 | -25.3 | -10.4 | 4.8 | 1.3 | chow<br>based                   |
| Adamu HA 2016                                                        | corn oil,<br>cream milk                      | 51.4 | 38.5 | -36.1 | -12.1 | 5.5 | 2.1 | chow<br>based                   |
| Trottier G 1998                                                      | soybean oil,<br>shortening                   | 42.2 | 29.2 | -19.3 | -3.3  | 4.3 | 0.8 | custom-<br>made                 |
| Kozak R 2000                                                         | margarine                                    | 73.7 | 42.5 | -39.1 | -3.4  | 5.5 | 1.2 | custom-<br>made<br>(in the lab) |
| Couvreur O 2011                                                      | palm oil                                     | 64.5 | 53.4 | -43.6 | -9.8  | 5.7 | 2.0 | custom-<br>made                 |
| Férézou-Viala J 2007                                                 | palm oil                                     | 64.5 | 52.6 | -45.9 | -6.7  | 5.7 | 1.9 | custom-<br>made                 |
| Hellgren LI, Lauritzen L 2014                                        | palm oil                                     | 48.5 | 33.2 | -20.4 | -12.8 | 4.2 | 1.3 | chow<br>based                   |
| Gregersen S, Hermansen K 2005<br>Dyrskog SE, Hermansen K 2005        | coconut oil                                  | 58.5 | 51.0 | -51.9 | 0.9   | 4.7 | 1.0 | custom-<br>made                 |
| Dong YM 2011 cohort a                                                | coconut oil                                  | 39.8 | 24.4 | -21.5 | -2.9  | 4.8 | 0.6 | custom-<br>made                 |
| Dong YM 2010 cohort b                                                | soybean oil                                  | 37.9 | 22.5 | -19.8 | -2.7  | 4.7 | 0.6 | custom-<br>made                 |
| Burckley AJ 2005                                                     | safflower oil                                | 59   | 47   | 45    | 2     | NA  | NA  | custom-<br>made                 |
| Chen H 2012<br>Chen H 2014                                           | hydrogenated<br>vegetable oil,<br>canola oil | 43   | 29   | -25   | -4    | 4.8 | 2.1 | comm.                           |
| Rajia S 2013                                                         | hydrogenated<br>vegetable oil,<br>canola oil | NA   | NA   | NA    | NA    | NA  | NA  | comm.                           |
| Xue Q 2015                                                           | NA                                           | 60.6 | 48.3 | -42.3 | -5.4  | 5.2 | 2.0 | NA                              |
| Sun B 2014                                                           | NA                                           | 50.5 | 37.5 | -29.7 | -7.8  | 4.3 | 1.3 | custom-<br>made<br>(in the lab) |
| Gray C, Vickens MH 2015                                              | NA                                           | 45   | 35   | NA    | NA    | NA  | NA  | comm.                           |
| Zaborska KE 2016                                                     | NA                                           | 45   | 35   | NA    | NA    | NA  | NA  | comm.                           |
| Hou M 2015                                                           | NA                                           | 28.8 | 18.0 | -16.1 | -1.9  | 4.7 | 0.5 | comm.                           |

**Supplementary Table S3: Assessment of methodological quality.**

Methodological quality was assessed based on statements of 1) random allocation into treatment and control groups, 2) husbandry conditions (e.g., light/dark cycle, temperature, access to water, and environmental enrichment), 3) compliance with animal welfare regulations, and 4) potential conflicts of interests, and whether the study appeared in a peer-reviewed publication. Each article was assessed independently by two reviewers and scored on a scale from 0 to 5 points.

| Reference                      | Statement of                                        |                      |                                            |                                 | Peer reviewed | Score |
|--------------------------------|-----------------------------------------------------|----------------------|--------------------------------------------|---------------------------------|---------------|-------|
|                                | Random allocation to experimental and control diets | Husbandry conditions | Compliance with animal welfare regulations | Potential conflict of interests |               |       |
| Burgueño AL 2013               | 1                                                   | 1                    | 1                                          | 1                               | 1             | 5     |
| Srinivasan M 2006              | 1                                                   | 1                    | 1                                          | 0                               | 1             | 4     |
| Tamashiro KL 2009              | 0                                                   | 1                    | 1                                          | 1                               | 1             | 4     |
| Sun B 2012                     | 0                                                   | 1                    | 1                                          | 1                               | 1             | 4     |
| Sun B 2013                     | 0                                                   | 1                    | 1                                          | 1                               | 1             | 4     |
| White CL, Bruce-Keller AJ 2009 | 0                                                   | 1                    | 1                                          | 0                               | 1             | 3     |
| White CL, Morrison CD 2009     | 0                                                   | 1                    | 1                                          | 0                               | 1             | 3     |
| Sasaki A 2013                  | 0                                                   | 1                    | 1                                          | 0                               | 1             | 3     |
| Marco A 2014                   | 1                                                   | 1                    | 1                                          | 0                               | 1             | 4     |
| Lecoutre S 2016                | 0                                                   | 1                    | 1                                          | 1                               | 1             | 4     |
| Ambrosetti V 2016              | 0                                                   | 1                    | 1                                          | 1                               | 1             | 4     |
| Guberman C 2013                | 0                                                   | 1                    | 1                                          | 1                               | 1             | 4     |
| Seet EL 2015                   | 1                                                   | 1                    | 1                                          | 1                               | 1             | 5     |
| Desai M 2014                   | 0                                                   | 1                    | 1                                          | 1                               | 1             | 4     |
| Desai M 2015                   | 0                                                   | 1                    | 1                                          | 1                               | 1             | 4     |
| Walker CD 2008                 | 0                                                   | 0                    | 0                                          | 1                               | 1             | 2     |
| Naef L 2008                    | 0                                                   | 1                    | 1                                          | 1                               | 1             | 4     |
| Koukkou E 1998                 | 0                                                   | 0                    | 0                                          | 0                               | 1             | 1     |
| Mendes-da-Silva C 2014         | 1                                                   | 1                    | 1                                          | 1                               | 1             | 5     |
| Taylor PD 2005                 | 0                                                   | 1                    | 1                                          | 0                               | 1             | 3     |
| Khan IY 2003                   | 0                                                   | 0                    | 0                                          | 0                               | 1             | 1     |
| Khan IY 2005                   | 0                                                   | 1                    | 0                                          | 0                               | 1             | 2     |
| Khan IY 2004                   | 0                                                   | 1                    | 1                                          | 0                               | 1             | 3     |
| Armitage JA 2005               | 0                                                   | 1                    | 1                                          | 0                               | 1             | 3     |
| Eleftheriades M 2014           | 1                                                   | 1                    | 1                                          | 1                               | 1             | 5     |
| Vega CC 2015                   | 1                                                   | 1                    | 1                                          | 1                               | 1             | 5     |
| Bautista CJ 2016               | 1                                                   | 1                    | 1                                          | 1                               | 1             | 5     |
| Rodríguez-González GL 2015     | 1                                                   | 1                    | 0                                          | 1                               | 1             | 4     |
| Zambrano E 2010                | 1                                                   | 1                    | 1                                          | 0                               | 1             | 4     |
| Santos M 2015                  | 1                                                   | 1                    | 1                                          | 1                               | 1             | 5     |
| Zhang X 2011                   | 0                                                   | 1                    | 1                                          | 1                               | 1             | 4     |
| Page KC 2009                   | 0                                                   | 1                    | 1                                          | 0                               | 1             | 3     |
| Howie GJ 2009                  | 0                                                   | 1                    | 1                                          | 0                               | 1             | 3     |
| Howie GJ 2013                  | 0                                                   | 1                    | 1                                          | 1                               | 1             | 4     |
| Smith T 2014                   | 0                                                   | 1                    | 1                                          | 1                               | 1             | 4     |
| Pereira TJ 2015                | 1                                                   | 1                    | 1                                          | 1                               | 1             | 5     |
| Cordero P 2015                 | 0                                                   | 1                    | 1                                          | 0                               | 1             | 3     |
| Sloboda DM 2009                | 0                                                   | 1                    | 1                                          | 1                               | 1             | 4     |
| Tsoulis MW 2016                | 1                                                   | 1                    | 1                                          | 0                               | 1             | 4     |
| Gray C, Reynolds CM 2015       | 1                                                   | 1                    | 1                                          | 1                               | 1             | 5     |
| Reynolds CM 2015               | 1                                                   | 1                    | 1                                          | 0                               | 1             | 4     |
| Pileggi CA 2016                | 1                                                   | 1                    | 1                                          | 1                               | 1             | 5     |
| Song Y 2015                    | 0                                                   | 1                    | 1                                          | 1                               | 1             | 4     |
| Latouche C 2014                | 0                                                   | 1                    | 1                                          | 1                               | 1             | 4     |

|                         |   |   |   |   |   |   |
|-------------------------|---|---|---|---|---|---|
| Yang KF 2012            | 1 | 1 | 1 | 0 | 1 | 4 |
| Ghosh P 2001            | 0 | 1 | 1 | 0 | 1 | 3 |
| Miotto PM 2013          | 1 | 1 | 1 | 1 | 1 | 5 |
| MacPherson RE 2015      | 0 | 1 | 1 | 1 | 1 | 4 |
| Hanafi MY 2016          | 1 | 1 | 1 | 1 | 1 | 5 |
| Kozak R 2000            | 1 | 1 | 1 | 0 | 1 | 4 |
| Mazzucco MB 2016        | 0 | 1 | 1 | 0 | 1 | 3 |
| Adamu HA 2016           | 0 | 1 | 1 | 1 | 1 | 4 |
| Trottier G 1998         | 0 | 1 | 1 | 0 | 1 | 3 |
| Couvreur O 2011         | 1 | 1 | 1 | 1 | 1 | 5 |
| Férézou-Viala J 2007    | 0 | 1 | 1 | 0 | 1 | 3 |
| Hellgren LI 2014        | 0 | 1 | 1 | 1 | 1 | 4 |
| Gregersen S 2005        | 0 | 1 | 1 | 0 | 1 | 3 |
| Dyrskog SE 2005         | 0 | 1 | 1 | 0 | 1 | 3 |
| Dong YM 2011            | 0 | 1 | 1 | 1 | 1 | 4 |
| Burckley AJ 2005        | 1 | 1 | 1 | 0 | 1 | 4 |
| Chen H 2012             | 0 | 1 | 1 | 1 | 1 | 4 |
| Rajia S 2013            | 0 | 1 | 1 | 1 | 1 | 4 |
| Chen H 2014             | 0 | 1 | 1 | 1 | 1 | 4 |
| Xue Q 2015              | 1 | 1 | 1 | 1 | 1 | 5 |
| Sun B 2014              | 0 | 1 | 1 | 1 | 1 | 4 |
| Gray C, Vickers MH 2015 | 1 | 1 | 1 | 1 | 1 | 5 |
| Zaborska KE 2016        | 0 | 1 | 1 | 1 | 1 | 4 |
| Hou M 2015              | 1 | 1 | 1 | 1 | 1 | 5 |

**Supplementary Table S4:** Search Strategy for Pubmed (last conducted June 30, 2016).

Key MeSH terms used in the search strategy include: high fat, high-fat, lard-fed, fat-rich, mothers, maternal, pregnancy, gestation, rat, offspring.

| Query                                                                                                                                                                                                  | Items found |
|--------------------------------------------------------------------------------------------------------------------------------------------------------------------------------------------------------|-------------|
| HIGH-FAT[All Fields] AND ("mothers"[MeSH Terms] OR "mothers"[All Fields] OR "maternal"[All Fields]) AND ("rats"[MeSH Terms] OR "rats"[All Fields] OR "rat"[All Fields]) AND OFFSPRING[All Fields]      | 312         |
| HIGH-FAT[All Fields] AND ("pregnancy"[MeSH Terms] OR "pregnancy"[All Fields] OR "gestation"[All Fields]) AND ("rats"[MeSH Terms] OR "rats"[All Fields] OR "rat"[All Fields]) AND OFFSPRING[All Fields] | 338         |
| LARD-FED[All Fields] AND ("mothers"[MeSH Terms] OR "mothers"[All Fields] OR "maternal"[All Fields]) AND ("rats"[MeSH Terms] OR "rats"[All Fields] OR "rat"[All Fields]) AND OFFSPRING[All Fields]      | 3           |
| LARD-FED[All Fields] AND ("pregnancy"[MeSH Terms] OR "pregnancy"[All Fields] OR "gestation"[All Fields]) AND ("rats"[MeSH Terms] OR "rats"[All Fields] OR "rat"[All Fields]) AND OFFSPRING[All Fields] | 3           |
| FAT-RICH[All Fields] AND ("mothers"[MeSH Terms] OR "mothers"[All Fields] OR "maternal"[All Fields]) AND ("rats"[MeSH Terms] OR "rats"[All Fields] OR "rat"[All Fields]) AND OFFSPRING[All Fields]      | 16          |
| FAT-RICH[All Fields] AND ("pregnancy"[MeSH Terms] OR "pregnancy"[All Fields] OR "gestation"[All Fields]) AND ("rats"[MeSH Terms] OR "rats"[All Fields] OR "rat"[All Fields]) AND OFFSPRING[All Fields] | 19          |
|                                                                                                                                                                                                        | 691         |

OTHER SOURCES: forward and backward searches, reviews, experimental papers, author-based searches [50 records].

**Supplementary Table S5:** Detailed technical description of the coding of extracted data and parameters (modified from Besson AA et al, {Besson, 2016 BESSON2016 /id}).

**reference:** author's names and date

**publish\_date:** publish date (year)

**impact\_factor:** publication impact factor

**strain:** strain

**fat\_exp\_kcal:** energy from fat in experimental diet (%kcal)

**carb\_exp\_kcal:** energy from carbohydrates in experimental diet (%kcal)

**protein\_exp\_kcal:** energy from protein in experimental diet (%kcal)

**fat\_con\_kcal:** energy from fat in control diet (%kcal)

**carb\_con\_kcal:** energy from carbohydrates in control diet (%kcal)

**protein\_con\_kcal:** energy from protein in control diet (%kcal)

*When the composition in % kcal was not available, it was calculated from the available data in %w/w or it was taken from data declared by manufacturer*

**fat\_exp-con\_kcal:** increase in energy from fat in experimental diet relative to the control group (%kcal), fat is expressed as a difference relative to the control diet

**carb\_exp-con\_kcal:** carbohydrates in experimental diet are expressed as a difference relative to the control diet (%kcal)

**protein\_exp-con\_kcal:** protein in experimental is expressed as a difference relative to the control diet (%kcal)

**P:NP ratio:** protein-to-non protein ratio in experimental diet (%kcal)

**energy\_exp:** metabolic energy of the experimental maternal diet (Kcal/g)

**energy\_con:** metabolic energy of the control maternal diet (Kcal/g)

**energy\_exp-con:** energy in experimental is expressed as a difference relative to the control diet (Kcal/g)

**fat\_source:** fat source of the experimental diet

**diet\_type:** maternal diet type (commercial, custom-made or chow-based, as far as could be judged from the description)

**adlib\_con:** were maternal control groups fed *ad libitum*? (yes or no)

**adlib\_exp:** were maternal experimental groups fed *ad libitum*? (yes or no)

**dam\_diet\_start:** start of the maternal diet in days (pre-conception)

**diet\_duration:** duration of intervention from start (pregestation or gestation) to end (birth or weanling) in days.

**diet\_timing:** period of maternal diet manipulation (pre/ges+lac, ges, ges+lac)

**age\_mating:** dam age at mating/conception

**dam\_age\_stage:** maternal age stage at mating/conception [2 sub-groups: young adult rats (PND63 to PND209) and adult (aged  $\geq$  210 days, musculoskeletal maturity)]

**random\_allocation:** random allocation into experimental and control groups (yes or no)

**husbandry:** husbandry conditions (e.g., breeding programs, light/dark cycle, temperature, type of food, access to water, and environmental enrichment) [yes or no]

**animal\_welfare:** compliance with animal welfare regulations [yes or no]

**disclosure:** statement of potential conflicts of interests [yes or no]

**peer\_reviewed:** whether the study appeared in a peer-reviewed publication [yes or no]

**litter\_size:** size of the litter (number of pups per dam)

**litter\_size\_equalized:** has litter size been equalized? (yes or no)

**sex:** sex of the offspring ( male, female, mixed sex)

**offspring\_diet:** offspring diet after weaning (type of control diet)

**birth\_weight\_sign:** was offspring birth weight in the experimental group decreased, increased or not different from control group?

**maternal\_weight\_sign:** was maternal weight during gestation in the experimental group increased or not different from control group? Maternal obesity during gestation was assumed if studies reported a significant increase in body weight in comparison to control dams.

**male\_genitor\_diet:** was male genitor fed experimental diet? (yes or no)

**For each outcome:**

**unit:** unit of the outcome measure taken

**exp\_mean:** mean of the offspring outcome measured for the experimental group

**exp\_sd:** SD of the offspring outcome measured for the experimental group

**exp\_n:** sample size for the offspring experimental group.

**con\_mean:** mean of offspring outcome measured for the control group

**con\_sd:** SD of the offspring outcome measured for the control group

**con\_n:** sample size for the offspring control group

**offspring\_age:** offspring age when outcome was tested [in days post-parturition]

**off\_age\_stage:** offspring age stage when outcome was tested [3 sub-groups: pre-pubertal and pubertal rats (< PND63), young adult rats (PND63 to PND209) and adult (aged  $\geq$  210 days, musculoskeletal maturity)]

**data\_plot:** was data extracted from 2D Bar Plot? (yes or no)

**method\_measurement**



**Supplementary Table S6:** List of excluded studies with reasons for exclusion.

The initial screen was based on the paper's title, abstract and occasional whole-text scan. We initially excluded studies not published in English, studies on other laboratory animals than rats, studies using no wild-type laboratory rats or rats with a condition or disease (obese, diabetic or hypertensive rats), studies where dams and/or offspring were subjected to other treatments (surgery, drugs, stress, exercise), and studies with maternal manipulations not matching inclusion criteria. Studies on male genitor HFD or maternal HFD during lactation alone were excluded. After initial screening, 203 full text articles were examined, 135 articles were excluded, with reasons:

| <b>PubMed ID</b>                                                                                                                                                   | <b>Article</b>                                                                                                                                                                                                                                                                                                                                                                                                                                                                                                                                                                               | <b>Reasons for exclusion</b>                    |
|--------------------------------------------------------------------------------------------------------------------------------------------------------------------|----------------------------------------------------------------------------------------------------------------------------------------------------------------------------------------------------------------------------------------------------------------------------------------------------------------------------------------------------------------------------------------------------------------------------------------------------------------------------------------------------------------------------------------------------------------------------------------------|-------------------------------------------------|
| 22395468<br>26102652<br>25716581<br>26075698<br>26643911<br>21187125                                                                                               | Epigenetics. 2012 Feb;7(2):183-90.<br>J Hypertens. 2015 Jun;33 Suppl 1:e101.<br>J Nutr Biochem. 2015 May;26(5):433-40.<br>J Matern Fetal Neonatal Med. 2016;29(9):1491-7.<br>J Mol Endocrinol. 2016 Feb;56(2):101-12.<br>Neuroscience. 2011 Mar 10;176:225-36.                                                                                                                                                                                                                                                                                                                               | Data from XY Plots or Whiskers Bar Graphs       |
| 26115784<br>23786443<br>12429652<br>23836027<br>26738750<br>16646052<br>19707592<br>24746835<br>17255173<br>22094600<br>22858203                                   | Chem Biol Interact. 2015 Sep 5;239:118-28.<br>Stress. 2013 Sep;16(5):540-8.<br>Clin Cancer Res. 2002 Nov;8(11):3601-10.<br>Psychopharmacology (Berl). 2013 Dec;230(4):509-24.<br>J Cereb Blood Flow Metab. 2016 Jan 6.<br>Int J Cancer. 2006 Oct 1;119(7):1537-46.<br>PLoS One. 2009 Aug 25;4(8):e6744.<br>J Nutr Biochem. 2014 Jun;25(6):613-22.<br>Exp Physiol. 2007 May;92(3):583-9.<br>Am J Physiol Gastrointest Liver Physiol. 2012 Jan 15;302(2):G250-9.<br>Nutrition. 2012 Nov-Dec;28(11-12):1165-71.                                                                                 | Missing or incomplete data on offspring outcome |
| 24791714<br>22411006<br>18614261                                                                                                                                   | Neuroscience. 2014 Jul 11;272:92-101<br>J Physiol. 2012 May 1;590(9):2167-80.<br>Clin Nutr. 2008 Aug;27(4):623-34.                                                                                                                                                                                                                                                                                                                                                                                                                                                                           | Incomplete data (n)                             |
| 15774514<br>15326063<br>15194731<br>20229585<br>27004609<br>24523341<br>25141872<br>27163678                                                                       | J Physiol. 2005 May 15;565(Pt 1):171-84.<br>Circulation. 2004 Aug 31;110(9):1097-102.<br>J Physiol. 2004 Aug 1;558(Pt 3):943-51.<br>Hepatology. 2010 Jun;51(6):2234-5.<br>Sci Rep. 2016 Mar 23;6:23525.<br>Am J Physiol Regul Integr Comp Physiol. 2014 Apr 15;306(8):R527-37.<br>J Dev Orig Health Dis. 2010 Aug;1(4):245-54.<br>PLoS One. 2016 May 10;11(5):e0155108.                                                                                                                                                                                                                      | Duplicated data                                 |
| 24498431<br>19576260<br>23310925<br>2336034<br>20403085<br>25498225<br>22564493<br>27342757<br>24498431<br>19576260<br>25498225<br>22564493<br>2336034<br>27342757 | PLoS One. 2014 Feb 3;9(2):e88127.<br>Food Chem Toxicol. 2009 Oct;47(10):2407-18.<br>J Endocrinol Invest. 2012 Dec;35(11):981-6.<br>Metabolism. 1990 May;39(5):468-73.<br>J Neuroendocrinol. 2010 Aug;22(8):905-14.<br>Neuroscience. 2015 Feb 12;286:364-70.<br>Physiol Behav. 2012 Nov 5;107(4):568-75.<br>Mol Nutr Food Res. 2016 Jun 25.<br>PLoS One. 2014 Feb 3;9(2):e88127.<br>Food Chem Toxicol. 2009 Oct;47(10):2407-18.<br>Neuroscience. 2015 Feb 12;286:364-70.<br>Physiol Behav. 2012 Nov 5;107(4):568-75.<br>Metabolism. 1990 May;39(5):468-73.<br>Mol Nutr Food Res. 2016 Jun 25. | Postnatal experimental diet                     |

|                                                                                                                                                                                                                                  |                                                                                                                                                                                                                                                                                                                                                                                                                                                                                                                                                                                                                                                                                                                                                                                                                                                                                                                                                                                                                                |                                                                                               |
|----------------------------------------------------------------------------------------------------------------------------------------------------------------------------------------------------------------------------------|--------------------------------------------------------------------------------------------------------------------------------------------------------------------------------------------------------------------------------------------------------------------------------------------------------------------------------------------------------------------------------------------------------------------------------------------------------------------------------------------------------------------------------------------------------------------------------------------------------------------------------------------------------------------------------------------------------------------------------------------------------------------------------------------------------------------------------------------------------------------------------------------------------------------------------------------------------------------------------------------------------------------------------|-----------------------------------------------------------------------------------------------|
| 25801629<br>24570028<br>24337156<br>22548153                                                                                                                                                                                     | Eur J Nutr. 2016 Mar;55(2):601-10.<br>Eur J Nutr. 2014 Dec;53(8):1669-83.<br>Diabetologia. 2014 Mar;57(3):614-22.<br>J Nutr Metab. 2012;2012:296935.                                                                                                                                                                                                                                                                                                                                                                                                                                                                                                                                                                                                                                                                                                                                                                                                                                                                           | Administration of vehicle                                                                     |
| 24416203<br>21901160<br>25336449<br>24450870<br>18032473<br>21862610                                                                                                                                                             | PLoS One. 2014 Jan 9;9(1):e84209.<br>PLoS One. 2011;6(8):e24068.<br>Physiol Genomics. 2014 Dec 1;46(23):841-50.<br>J Agric Food Chem. 2014 Feb 19;62(7):1590-601.<br>Am J Physiol Regul Integr Comp Physiol. 2008 Feb;294(2):R528-38.<br>Endocrinology. 2011 Nov;152(11):4158-70.                                                                                                                                                                                                                                                                                                                                                                                                                                                                                                                                                                                                                                                                                                                                              | Force-feeding                                                                                 |
| 23310925<br>20403085<br>21980407<br>23701669<br>23928377<br>19606226<br>21208789<br>26545531<br>20494379<br>18986302<br>22160775<br>23255587<br>27179663<br>26718219<br>19282828<br>26195235<br>24249969<br>21427213<br>24727340 | J Endocrinol Invest. 2012 Dec;35(11):981-6.<br>J Neuroendocrinol. 2010 Aug;22(8):905-14.<br>PLoS One. 2011;6(9):e25261.<br>J Neuroendocrinol. 2013 Aug;25(8):742-52.<br>Endocrinology. 2013 Oct;154(10):3610-21.<br>PLoS One. 2009 Jul 16;4(7):e6259.<br>Nutr Metab Cardiovasc Dis. 2012 Mar;22(3):269-76.<br>Nutr Hosp. 2015 Oct 1;32(4):1653-8.<br>Metabolism. 2010 Dec;59(12):1701-9.<br>Clin Sci (Lond). 2009 Apr;116(8):669-80.<br>Am J Physiol Renal Physiol. 2012 Mar 15;302(6):F774-83.<br>Am J Physiol Regul Integr Comp Physiol. 2013 Feb 15;304(4):R278-85.<br>Clin Exp Nephrol. 2016 May 14.<br>Behav Brain Res. 2016 Mar 15;301:124-31. (study ends before weaning)<br>Obesity (Silver Spring). 2009 Jul;17(7):1356-62. (study ends before weaning)<br>Eur J Nutr. 2016 Jun;55(4):1741-53. (study ends before weaning)<br>J Clin Biochem Nutr. 2013 Nov;53(3):150-7. (study ends before weaning)<br>FASEB J. 2011 Jul;25(7):2167-79. (preference test)<br>Physiol Behav. 2014 Jun 22;133:14-21. (preference test) | Cafeteria / Western diet<br>Junk food diet<br>High-fat-sucrose diet<br>High-fat-fructose diet |
| 21722163<br>23819696<br>23782871<br>20688090                                                                                                                                                                                     | Clin Exp Pharmacol Physiol. 2011 Sep;38(9):613-22. (chocolate and fructose)<br>Clin Exp Pharmacol Physiol. 2013 Sep;40(9):652-61. (chocolate and fructose)<br>Acta Physiol (Oxf). 2014 Jan;210(1):142-53. (chocolate and fructose)<br>Physiol Behav. 2010 Nov 2;101(4):494-502. (highly palatable liquid diet supplement)                                                                                                                                                                                                                                                                                                                                                                                                                                                                                                                                                                                                                                                                                                      | Other specific diets                                                                          |
| 20044786<br>12378380<br>16815496                                                                                                                                                                                                 | Eur J Nutr. 2010 Sep;49(6):337-43.<br>Diabetologia. 2002 Oct;45(10):1397-403.<br>Nutrition. 2006 Jul-Aug;22(7-8):820-9.                                                                                                                                                                                                                                                                                                                                                                                                                                                                                                                                                                                                                                                                                                                                                                                                                                                                                                        | Qualitative changes in fat content<br>Normolipidemic diets                                    |
| 24500433<br>19005075<br>15926937<br>26423785<br>22964789<br>22239918                                                                                                                                                             | Am J Physiol Regul Integr Comp Physiol. 2014 Apr 1;306(7):R499-509<br>J Neurosci. 2008 Nov 12;28(46):12107-19.<br>Eur J Neurosci. 2005 May;21(10):2887-92.<br>Physiol Behav. 2015 Dec 1;152(Pt A):119-27.<br>Int J Obes (Lond). 2013 Jun;37(6):885-8.<br>Int J Dev Neurosci. 2012 Apr;30(2):75-81.                                                                                                                                                                                                                                                                                                                                                                                                                                                                                                                                                                                                                                                                                                                             | Preference test<br>(consumption behavior)                                                     |
| 25738800<br>25614359                                                                                                                                                                                                             | PLoS One. 2015 Mar 4;10(3):e0118586. (exercise)<br>Psychoneuroendocrinology. 2015 Mar;53:82-93. (stress)                                                                                                                                                                                                                                                                                                                                                                                                                                                                                                                                                                                                                                                                                                                                                                                                                                                                                                                       | Offspring subjected to other treatments                                                       |

|                      |                                                                             |                           |
|----------------------|-----------------------------------------------------------------------------|---------------------------|
| 24146946<br>21779332 | PLoS One. 2013 Oct 17;8(10):e76961.<br>PLoS One. 2011;6(7):e21662.          | Study ends before weaning |
| 25991721             | Journal of Developmental Origins of Health and Disease (2011), 2(1), 63–70. |                           |
| 25191597             | Physiol Rep. 2015 May;3(5).                                                 |                           |
| 21730967             | J Nutr Sci. 2014 Jan 2;2:e41.                                               |                           |
| 21779332             | Int J Obes (Lond). 2012 May;36(5):744-51.                                   |                           |
| 26224356             | PLoS One. 2011;6(7):e21662.                                                 |                           |
| 18635655             | Nutr Metab Cardiovasc Dis. 2015 Sep;25(9):881-8.                            |                           |
| 27385731             | Endocrinology. 2008 Nov;149(11):5348-56.                                    |                           |
| 1941255              | Am J Physiol Regul Integr Comp Physiol. 2016 Sep 1;311(3):R497-504          |                           |
| 4691274              | J Nutr. 1991 Dec;121(12):1917-23.                                           |                           |
| 15705804             | Am J Physiol. 1973 Mar;224(3):596-9.                                        |                           |
| 20160134             | Am J Physiol Regul Integr Comp Physiol. 2005 May;288(5):R1122-8.            |                           |
| 22696509             | Endocrinology. 2010 Apr;151(4):1685-94.                                     |                           |
| 24445041             | J Mol Endocrinol. 2012 Jul 25;49(2):107-14.                                 |                           |
| 24147051             | J Nutr Biochem. 2014 Feb;25(2):170-6.                                       |                           |
| 26979053             | PLoS One. 2013 Oct 11;8(10):e77668.                                         |                           |
| 19622195             | Neuroscience. 2016 Jun 2;324:407-19.                                        |                           |
| 19074472             | Br J Nutr. 2009 Dec;102(11):1601-10.                                        |                           |
| 22693204             | J Endocrinol. 2009 Mar;200(3):293-300.                                      |                           |
| 22131269             | Am J Physiol Endocrinol Metab. 2012 Aug 1;303(3):E432-41.                   |                           |
| 24043569             | FASEB J. 2012 Mar;26(3):1131-41.                                            |                           |
| 20972941             | Metab Brain Dis. 2013 Dec;28(4):721-5.                                      |                           |
| 26493953             | Horm Metab Res. 2010 Dec;42(13):923-9.                                      |                           |
| 25096554             | Physiol Rep. 2015 Oct;3(10). pii: e12588.                                   |                           |
| 26873412             | Physiol Rep. 2014 Aug 5;2(8). pii: e12110.                                  |                           |
| 25853572             | Physiol Behav. 2016 Apr 1;157:237-45.                                       |                           |
| 20711951             | PLoS One. 2015 Apr 8;10(4):e0120980.                                        |                           |
| 17414058             | Horm Metab Res. 2010 Oct;42(11):821-5.                                      |                           |
| 20195946             | Pancreas. 2007 Apr;34(3):347-53.                                            |                           |
| 21266050             | Horm Metab Res. 2010 May;42(5):307-10.                                      |                           |
| 16469158             | Lipids Health Dis. 2011 Jan 25;10:22.                                       |                           |
| 9802435              | Br J Nutr. 2006 Feb;95(2):391-6.                                            |                           |
| 27127509             | Regul Pept. 1998 Sep 25;75-76:397-402.                                      |                           |
| 22869015             | Int J Endocrinol. 2016;2016:5739763.                                        |                           |
| 26287659             | J Physiol. 2012 Nov 1;590(21):5503-18.                                      |                           |
| 18982008             | Int J Dev Neurosci. 2015 Nov;46:67-75.                                      |                           |
| 7777603              | Int J Obes (Lond). 2009 Jan;33(1):115-22.                                   |                           |
| 21605577             | Physiol Behav. 1995 Apr;57(4):681-6.                                        |                           |
| 23038630             | Physiol Behav. 2011 Sep 1;104(3):474-9.                                     |                           |
| 26583035             | Mol Nutr Food Res. 2012 Nov;56(11):1715-28.                                 |                           |
| 25152240             | Nutr Metab (Lond). 2015 Nov 14;12:40.                                       |                           |
| 26318151             | Int J Obes (Lond). 2015 Jan;39(1):7-15.                                     |                           |
| 23333087             | J Nutr Biochem. 2015 Dec;26(12):1448-57.                                    |                           |
| 24852604             | J Nutr Biochem. 2013 Jul;24(7):1340-8.                                      |                           |
| 16487482             | PLoS One. 2014 May 22;9(5):e97838.                                          |                           |
| 26801311             | Biochem Biophys Res Commun. 2006 Apr 7;342(2):452-8.                        |                           |
| 12719763             | Am J Physiol Heart Circ Physiol. 2016 Mar 15;310(6):H681-92.                |                           |
| 10615212             | Exp Physiol. 2003 May;88(3):389-98.                                         |                           |
| 25920746             | Br J Nutr. 1999 May;81(5):395-404.                                          |                           |
|                      | Lipids. 2015 Jun;50(6):605-10.                                              |                           |

**Supplementary Figure S1:** Timing of maternal dietary manipulations in experiments included in the extended dataset.

Data are presented separately for each outcome. Each horizontal line represents the manipulation timing associated with one effect size.

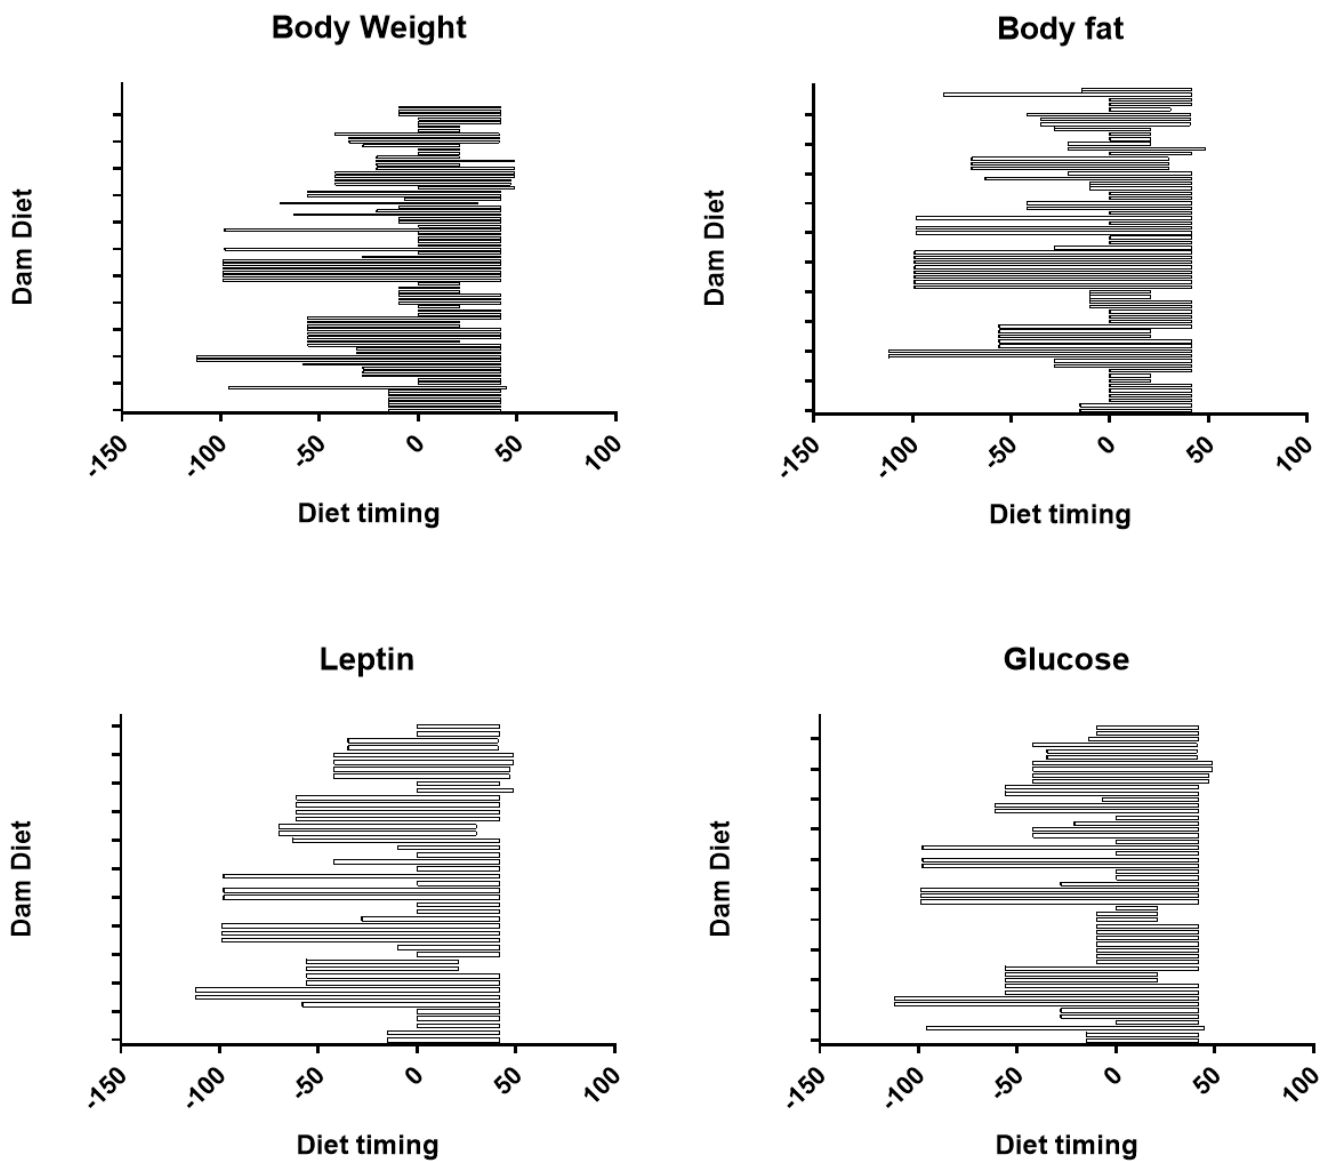

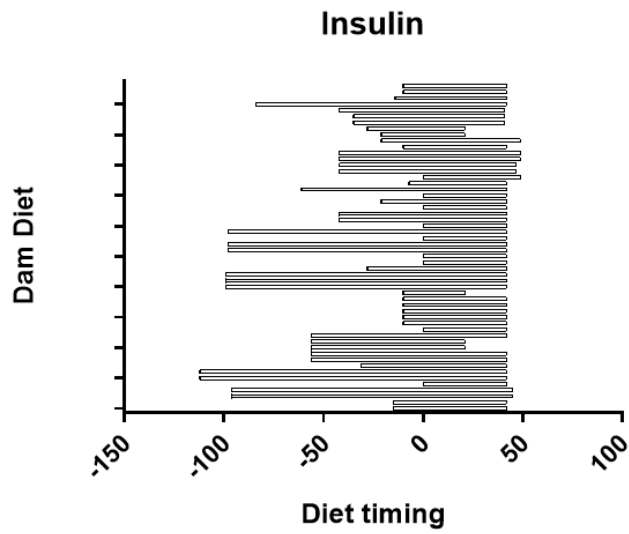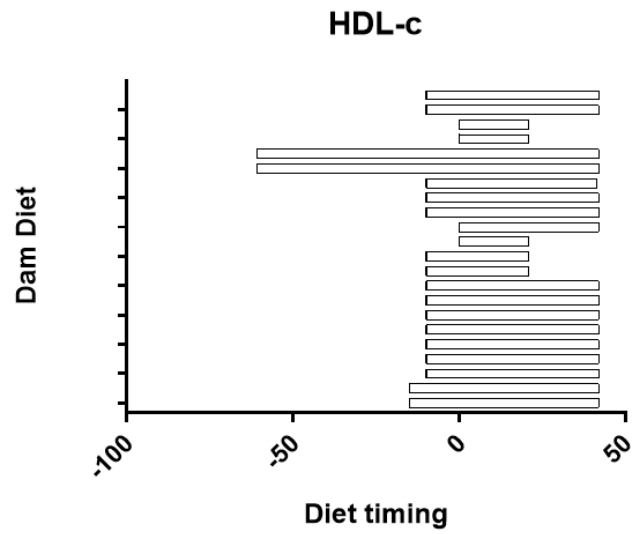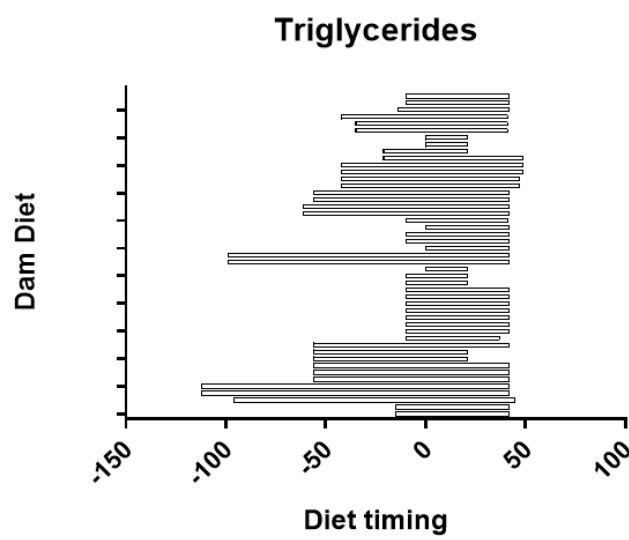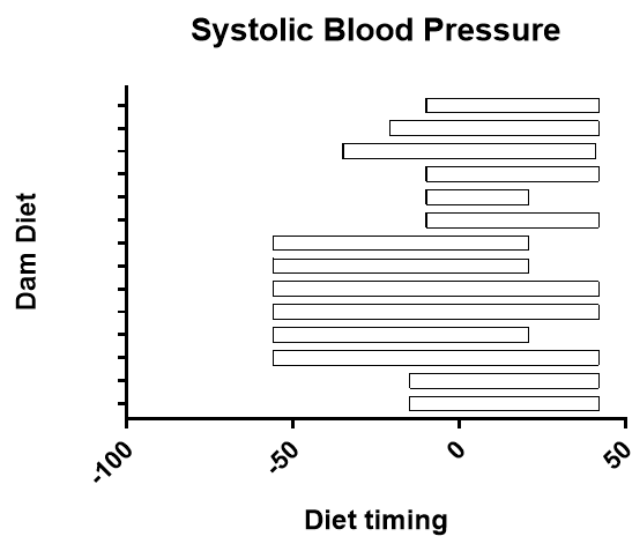

**Supplementary Figure S2:** Energy from fat (%kcal) and protein (%kcal) in experimental and control diets. Data are presented separately for each outcome.

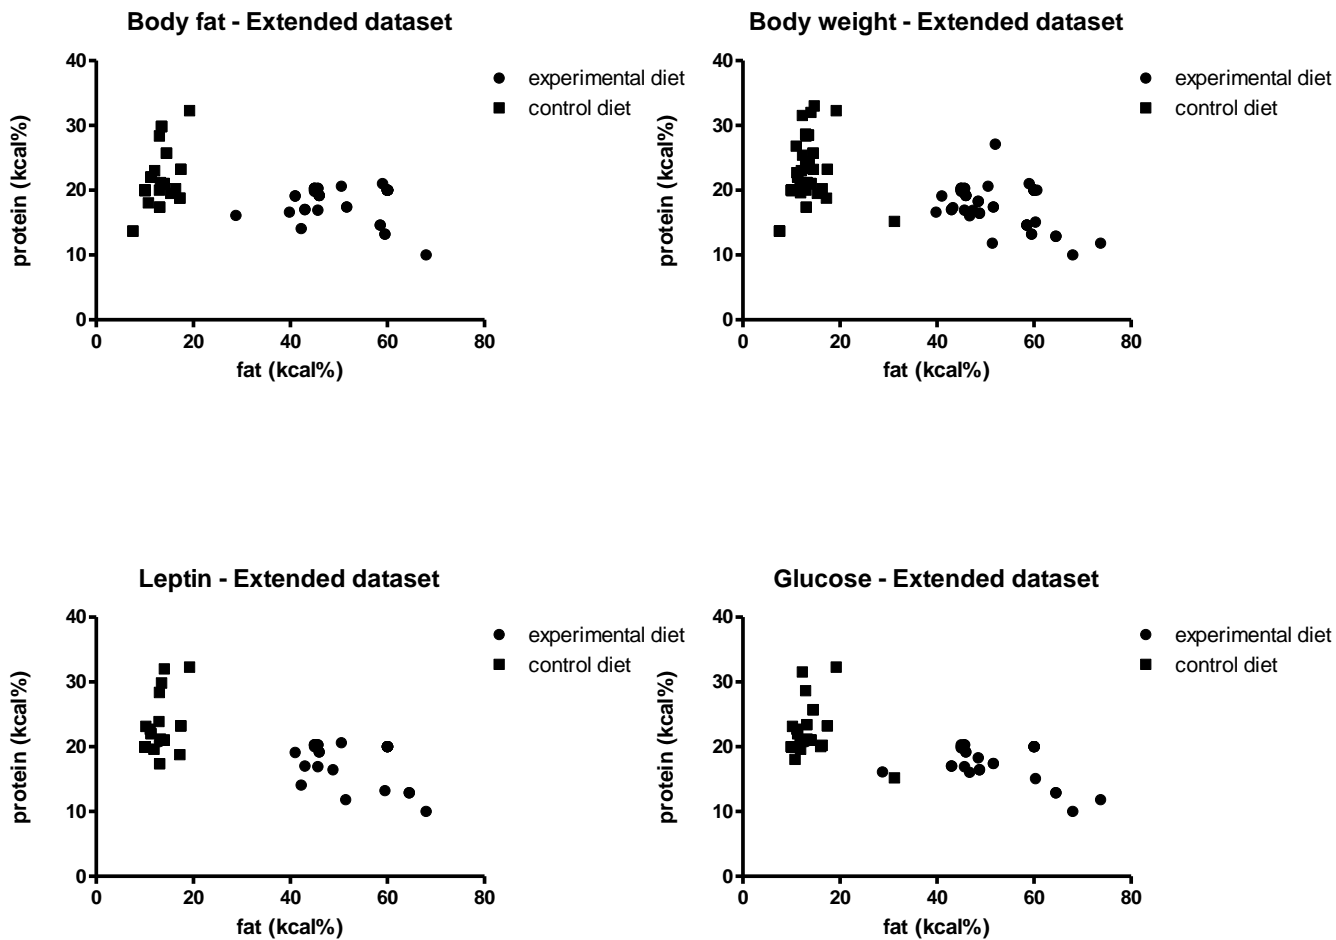

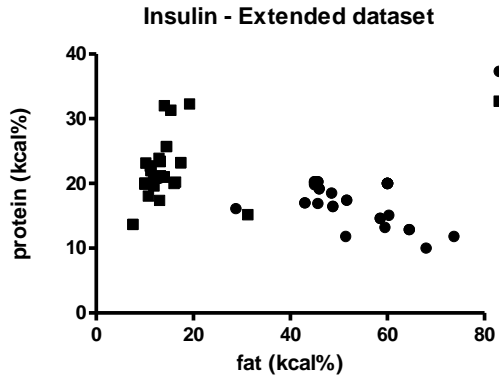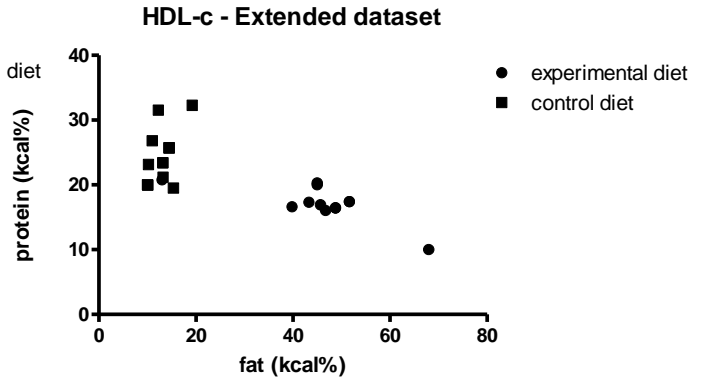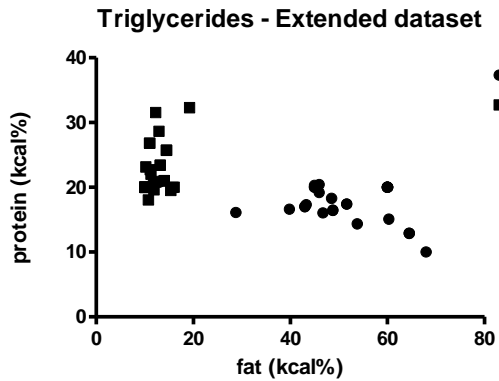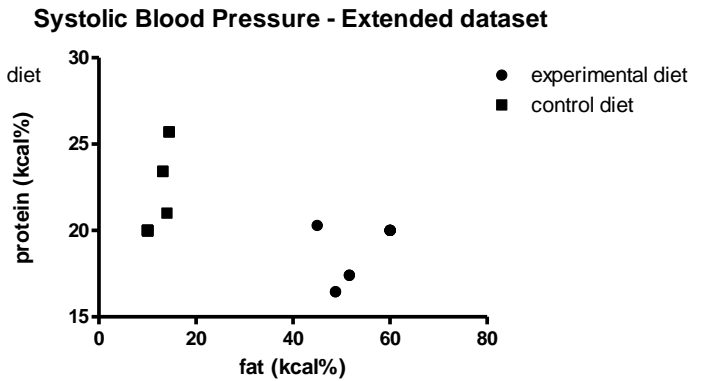

### Supplementary Figure S3: Forest Plots for data on main dataset.

Summary estimates for standardized difference in means (D) (effect); the corresponding 95 % CI (lower and upper) and significance (p value) were estimated by fixed and random effects analysis. The first author of the study and the year of publication are shown. In the graph, numbers indicate D values, filled squares stand for the effect of individual studies, and filled diamonds express combined fixed and random effects.

Panel A Forest Plot for Body fat

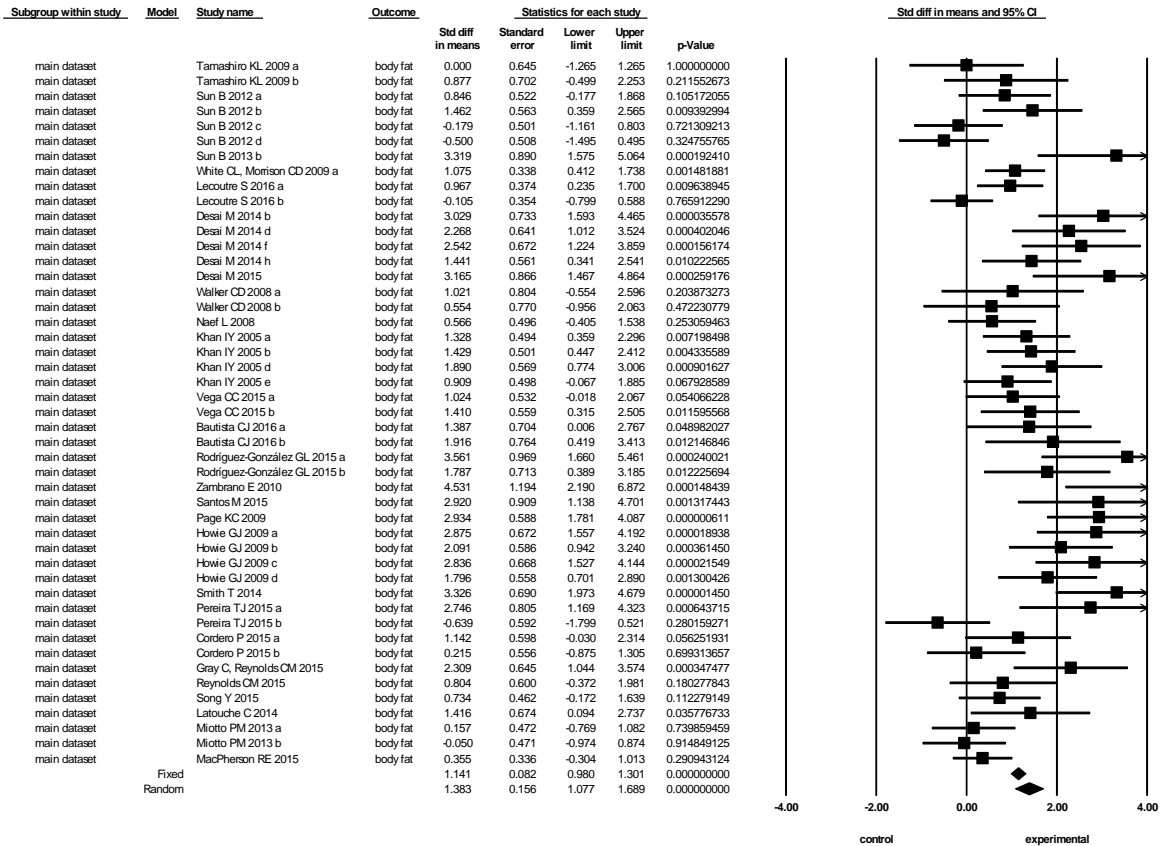



## Panel B Forest Plot for Body weight

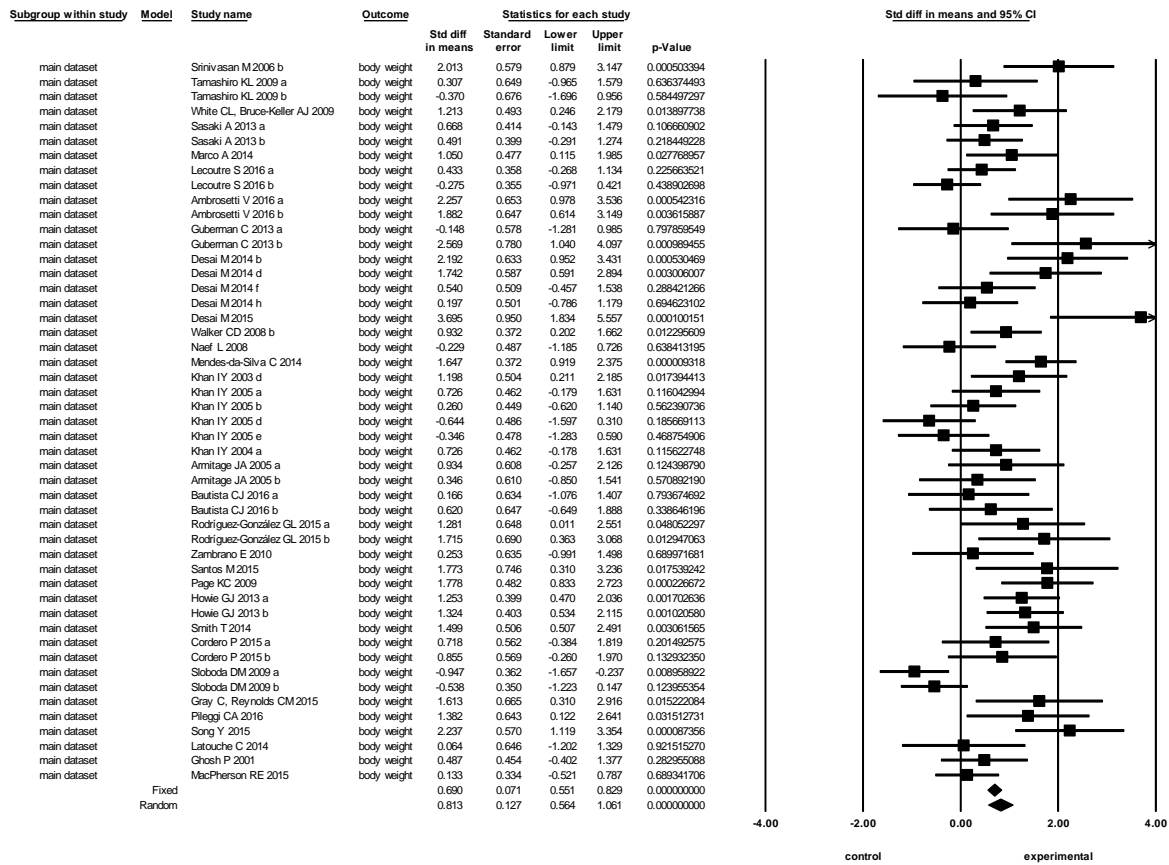

## Panel C Forest Plot for Leptin

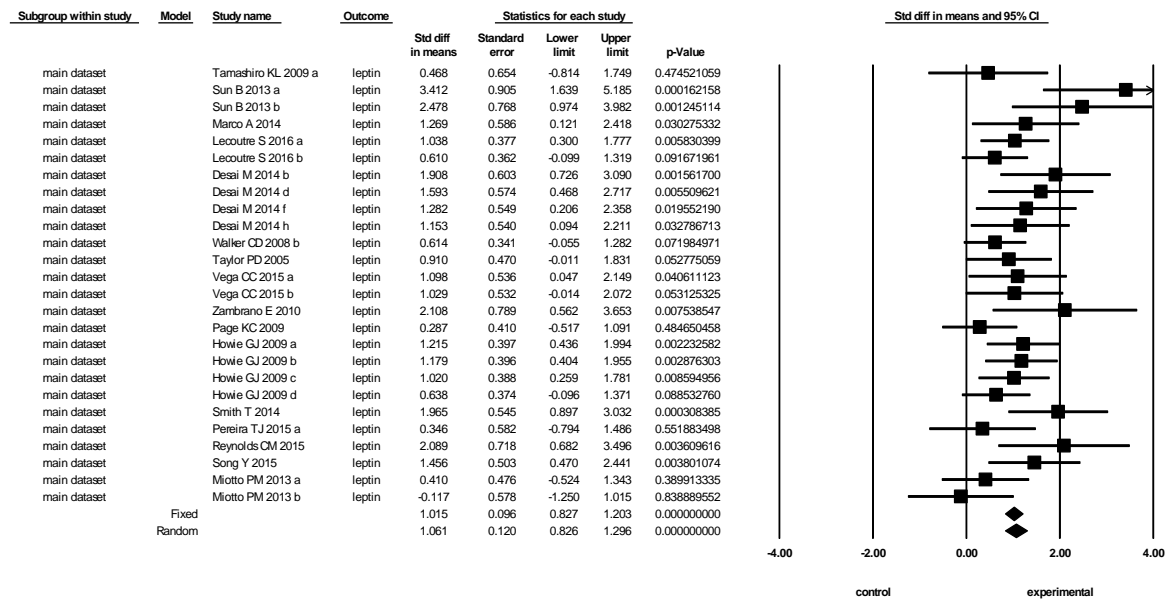

## Panel D Forest Plot for Glucose

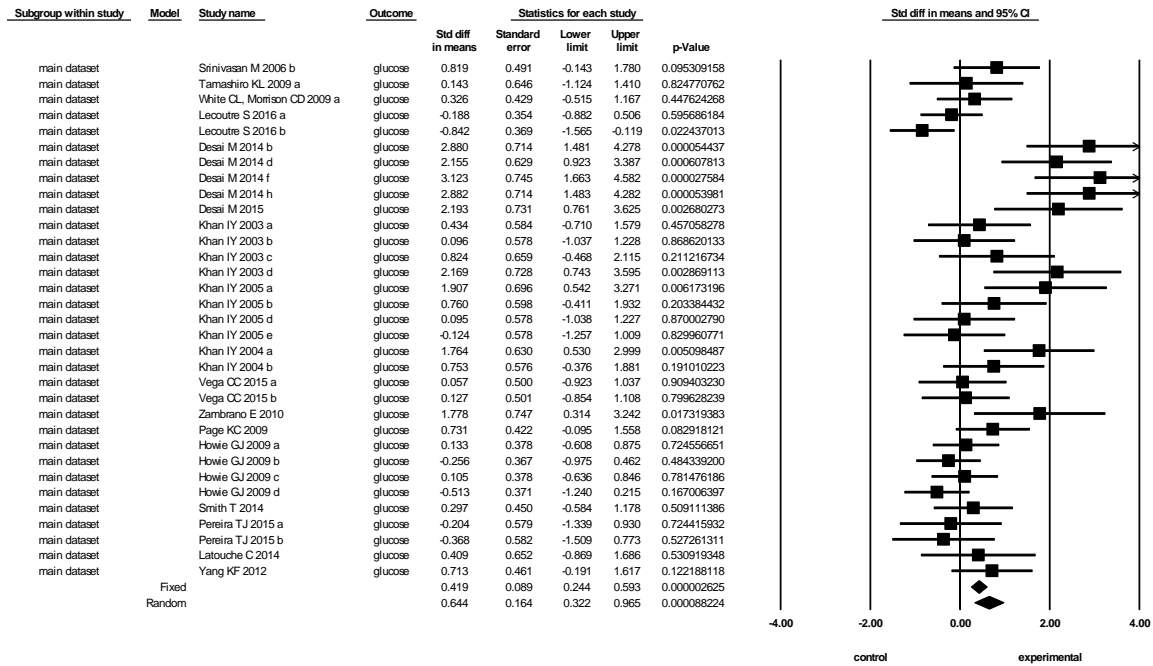

## Panel E Forest Plot for Insulin

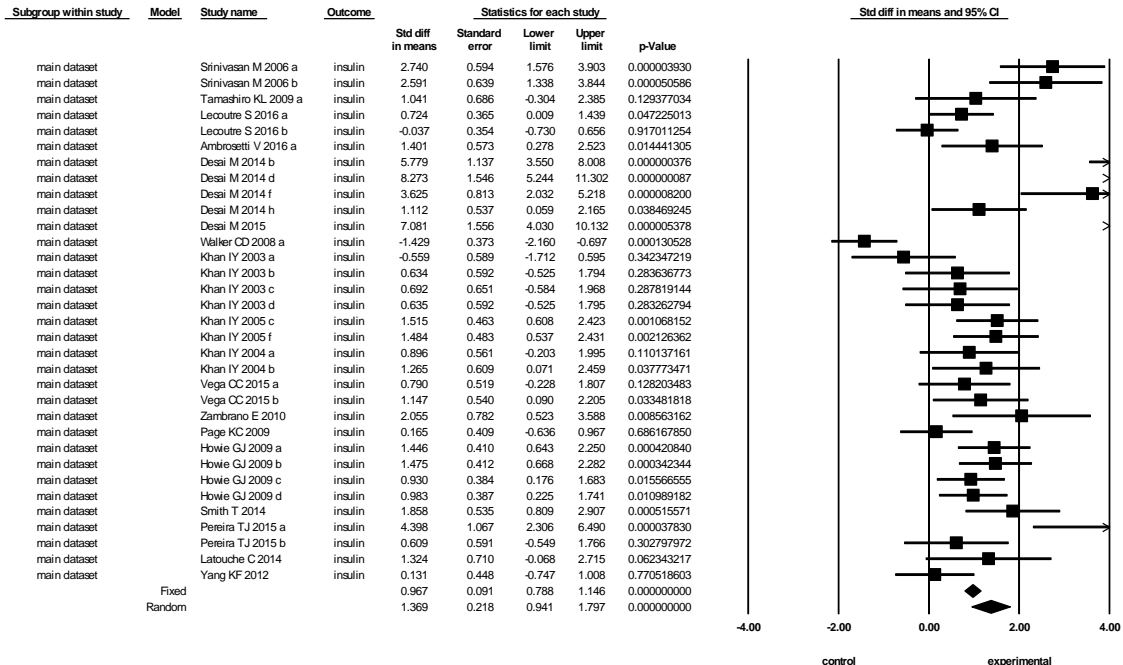

## Panel F Forest Plot for HDL-c

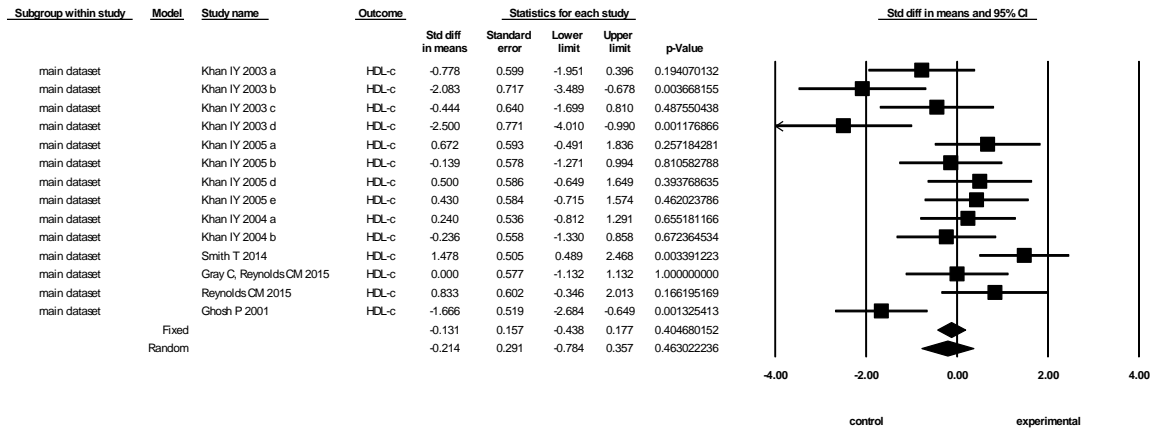

## Panel G Forest Plot for Triglycerides

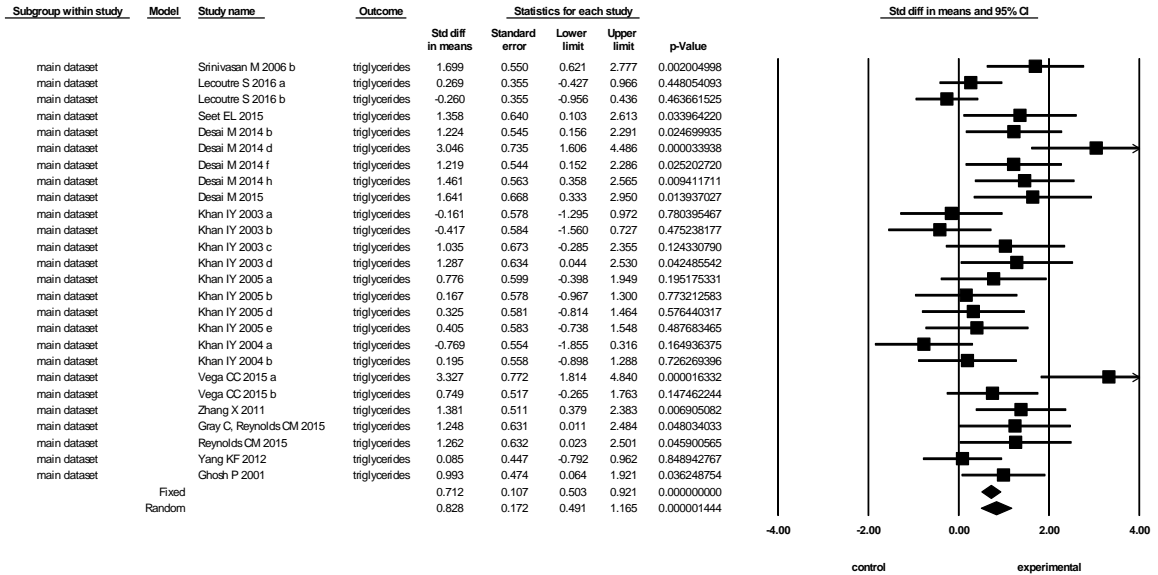

# Panel H Forest Plot for Systolic Blood Pressure

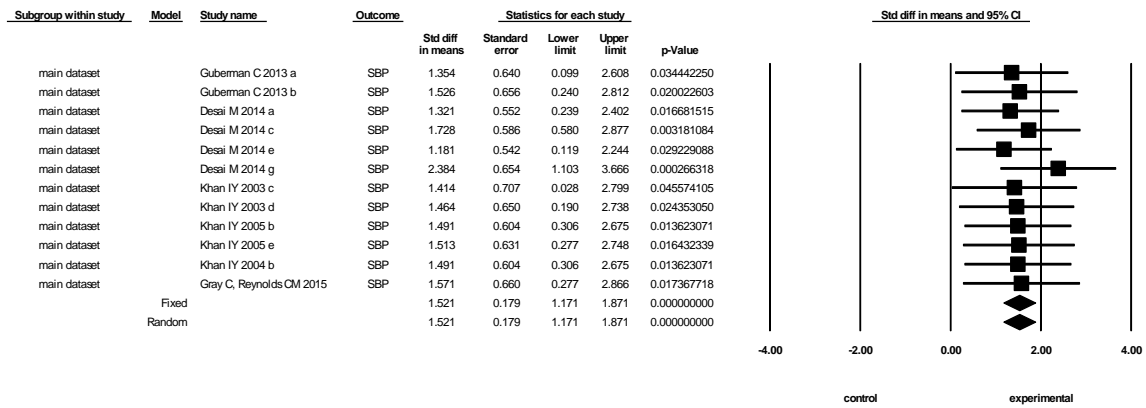

**Supplementary Figure S4: Subgroup analyses for HDL-c, extended dataset.**

Horizontal lines represent the 95% CIs for the data. The summarized effects (D) are considered statistically significant when their 95% CIs do not cross zero. We used a random-effect model (filled circles) whether heterogeneity was observed, while the fixed-effect model was applied in the absence of heterogeneity (filled squares). Included moderators for the main data set are: strain (Sprague Dawley, Wistar), sex (male, female), offspring age at testing (young adult), maternal age (young adult), intervention timing [perinatal (gestation and lactation), restricted to gestation period], maternal body weight (increased, not increased), birth weight (decreased, increased, not different), and diet type (chow-based, commercial). Abbreviations: n: number of data points, SD: Sprague Dawley, YA: Young Age, GES: gestation period only, GES+LAC: gestation and suckling periods, BW: body weight, NS: not significant.

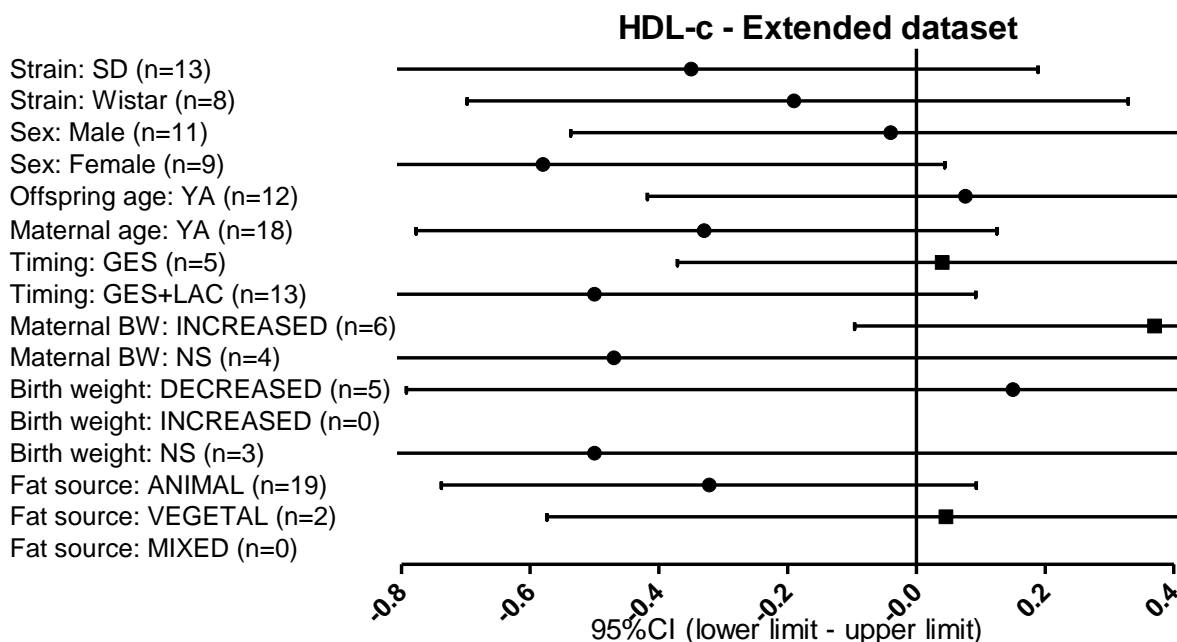

**Supplementary Figure S5: Subgroup analyses for main dataset.**

Horizontal lines represent the 95% CIs for the data. The summarized effects (D) are considered statistically significant when their 95% CIs do not cross zero. We used a random-effect model (filled circles) whether heterogeneity was observed, while the fixed-effect model was applied in the absence of heterogeneity (filled squares). Included moderators for the main data set are: strain (Sprague Dawley, Wistar), sex (male, female), offspring age at testing (young adult), maternal age (young adult), intervention timing [perinatal (gestation and lactation), restricted to gestation period], maternal body weight (increased, not increased), birth weight (decreased, increased, not different), and diet type (chow-based, commercial). Subgroup analysis of subsets where heterogeneity was not significant was not performed (leptin and SBP subsets). Abbreviations: n: number of data points, SD: Sprague Dawley, YA: Young Age, GES: gestation period only, GES+LAC: gestation and suckling periods, BW: body weight, NS: not significant.

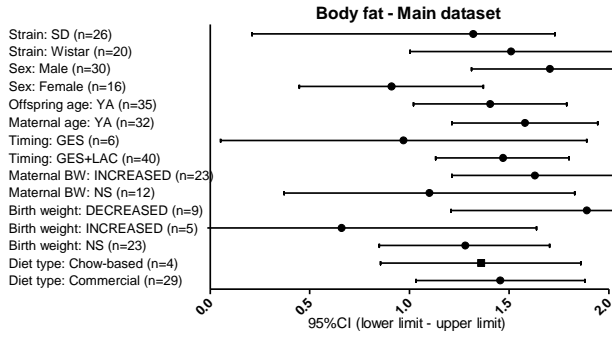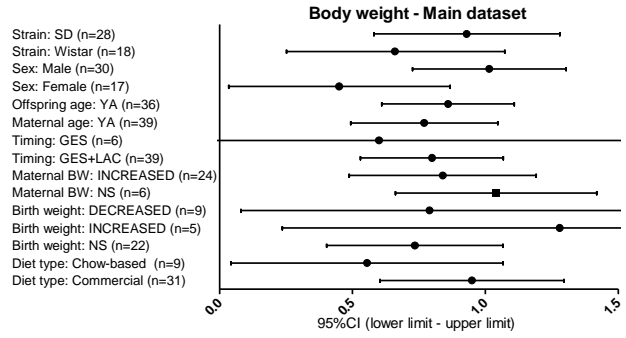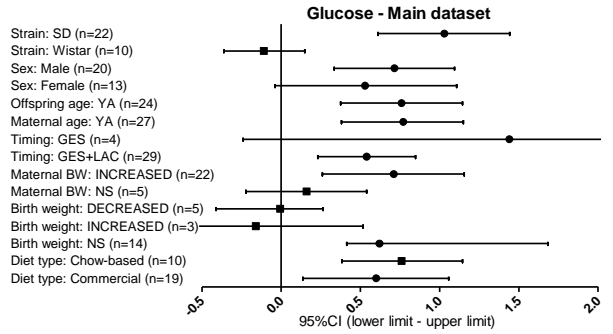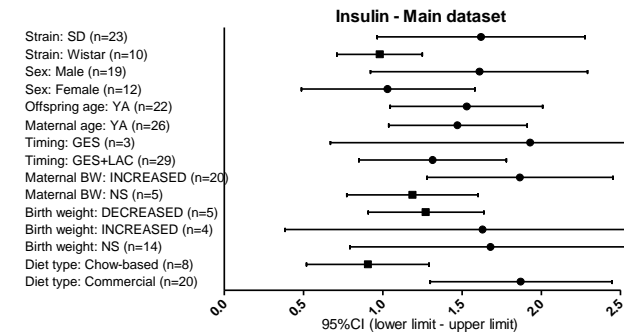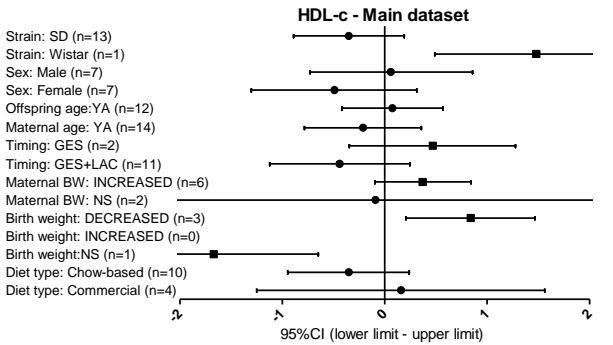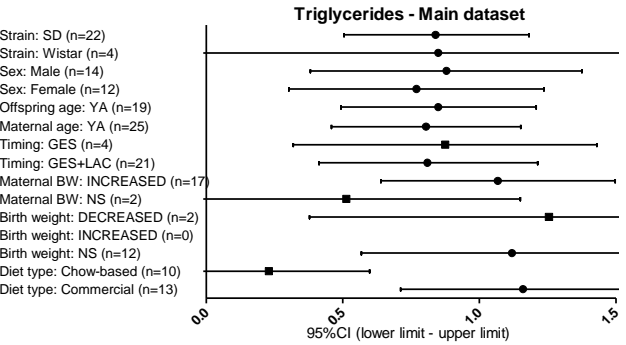

## Supplementary Figure S6: Meta-regression uncovering the potential influence of moderators.

Bubble plots showing the relationship (fitted regression lines) of moderator on changes in outcomes. The bubbles represent the estimates from each study; positive slopes indicate increased effect sizes with increasing levels of moderator. We examined the potential influence of: 1) offspring age at measurement (offspring\_age) in young adults, 2) maternal age at mating/conception (age\_mating) in young adult dams, 3) dietary intervention start (diet\_duration), 4) litter size (litter\_size), 5) increase in energy from fat in experimental diet with respect to control diet (fat\_exp-con\_kcal), and 6) protein-to-non protein ratio in experimental diet (P:NP). We additionally ran a meta-regression with gender as predictor variable to estimate the impact of sex on effect size (values of 1 for males and 2 for females were arbitrarily assigned). Data are presented only for significant slope p-values separately for each dataset and for each outcome. If visual inspection of the effect plots revealed that the result was driven by a single outlying data point or by two not independent data points from one same study, analysis was repeated after removing those data points.

### Body fat – extended dataset

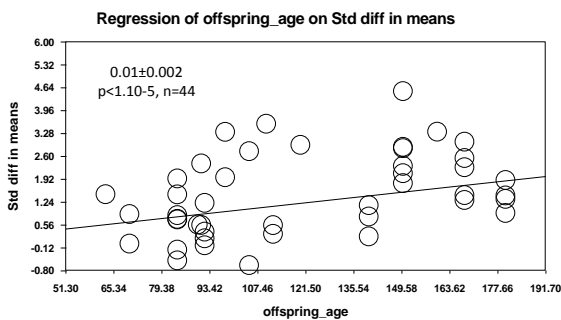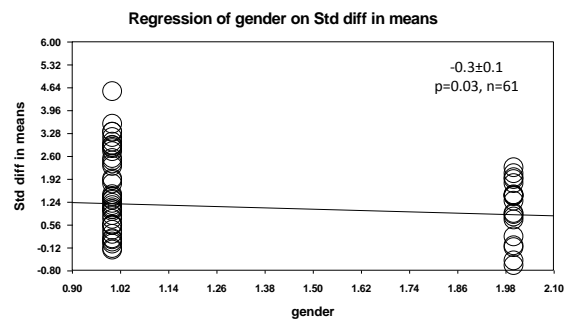

### Body fat– main dataset

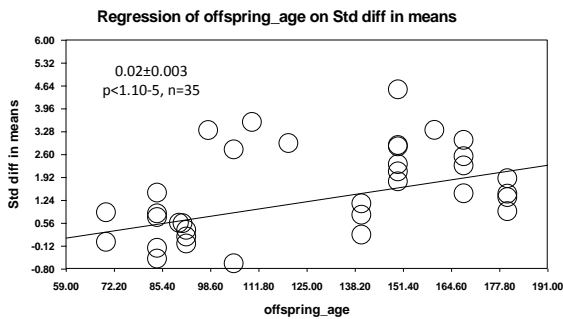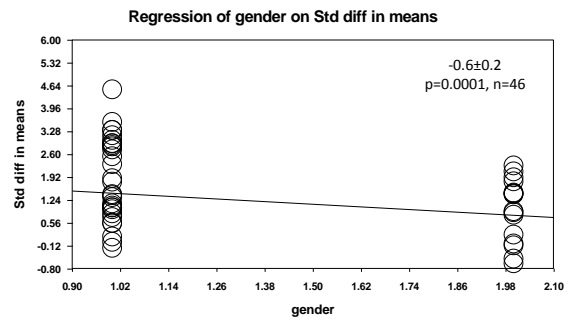

### Body weight – extended dataset

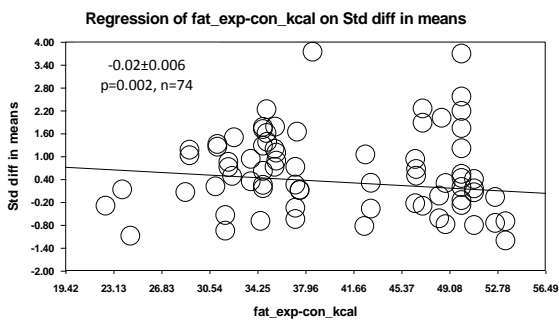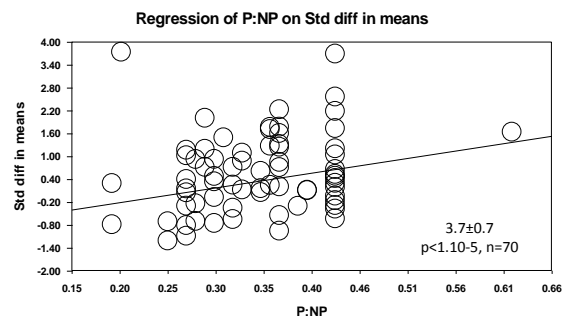

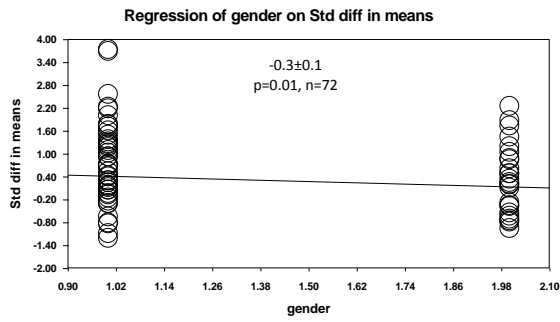

## Body weight – main dataset

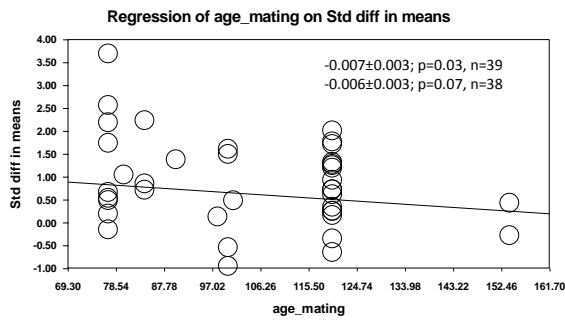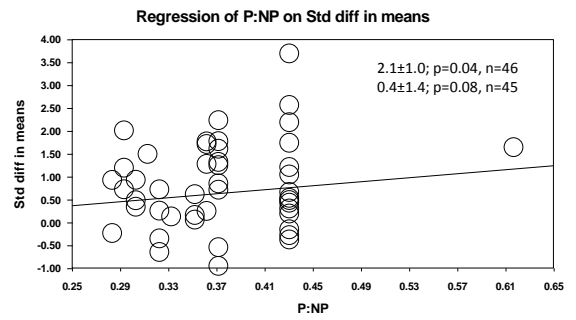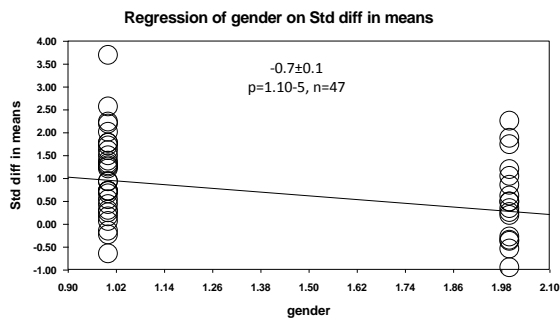

## Leptin – extended dataset

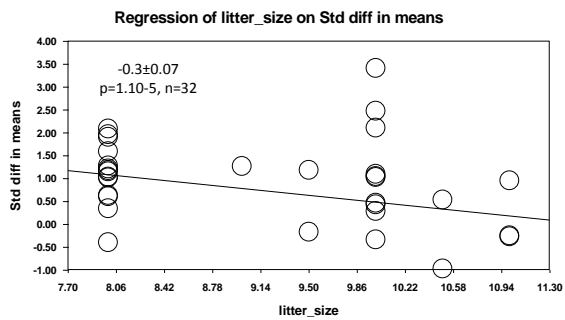



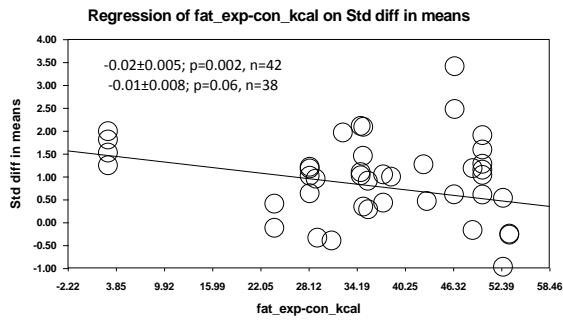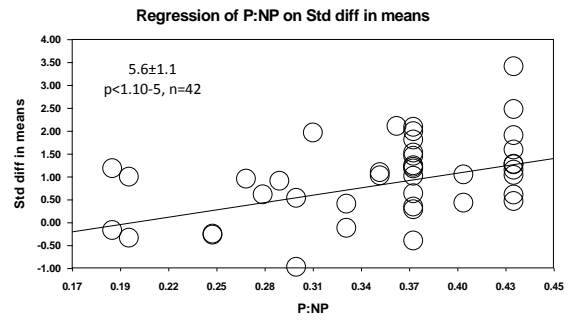

## Leptin – main dataset

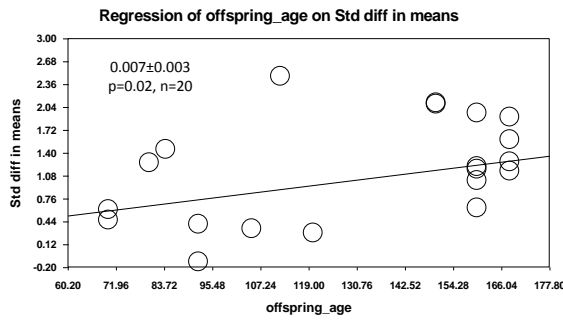

## Glucose – extended dataset

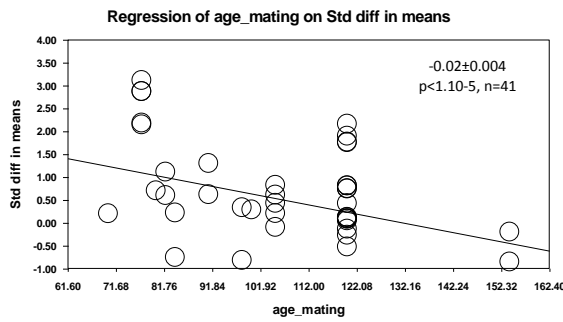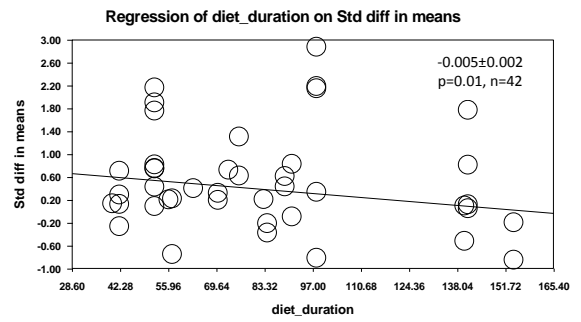

## Glucose – main dataset

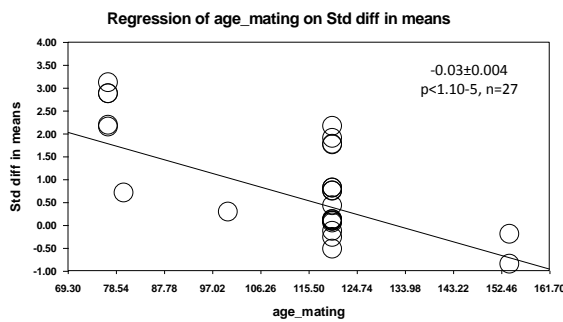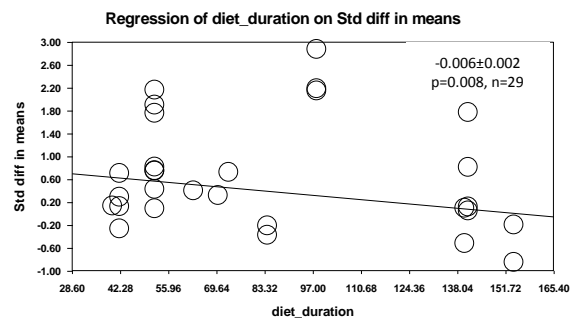

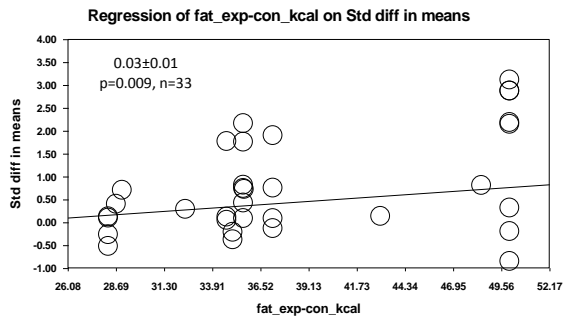

## Insulin – extended dataset

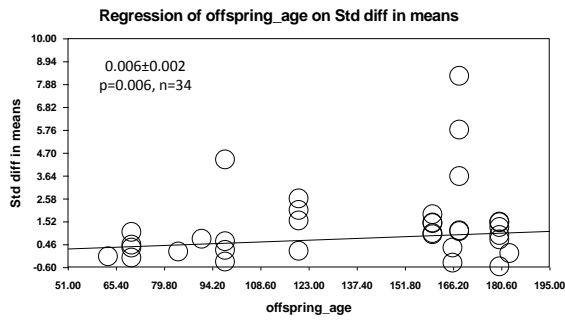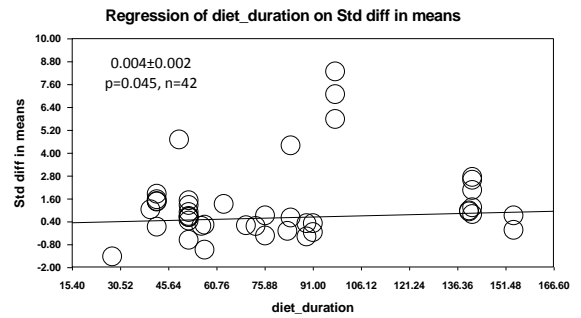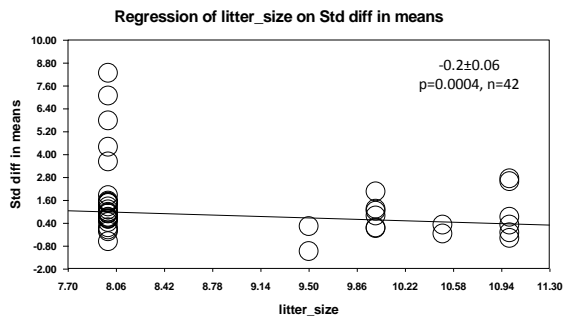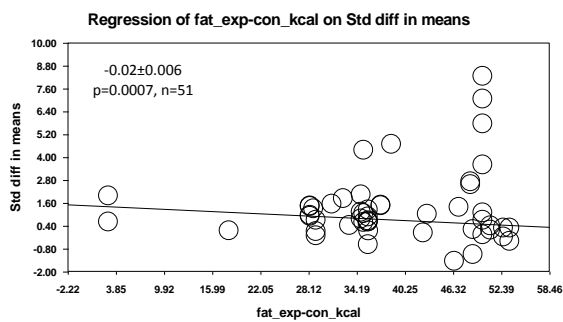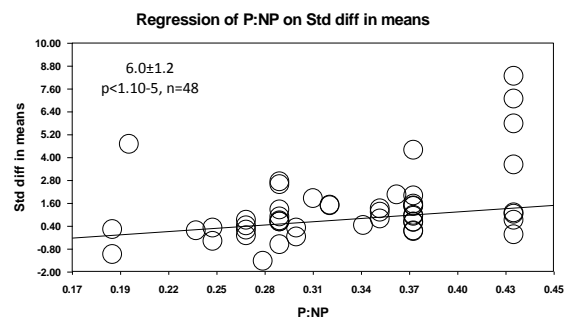

## Insulin – main dataset

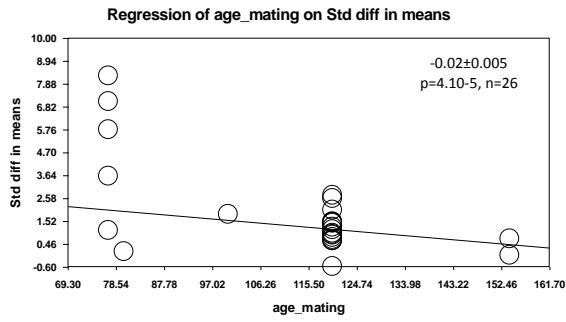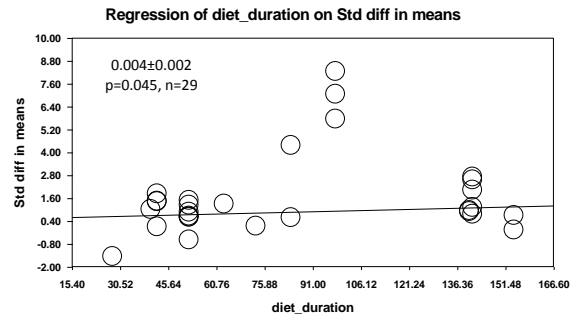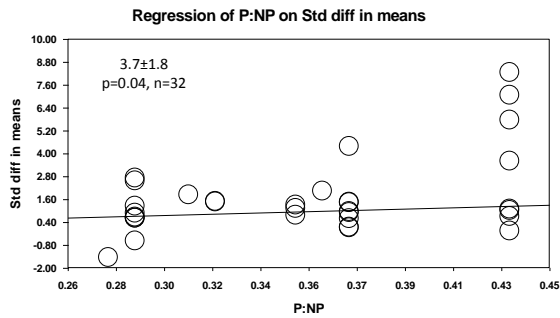

### HDL cholesterol – extended dataset

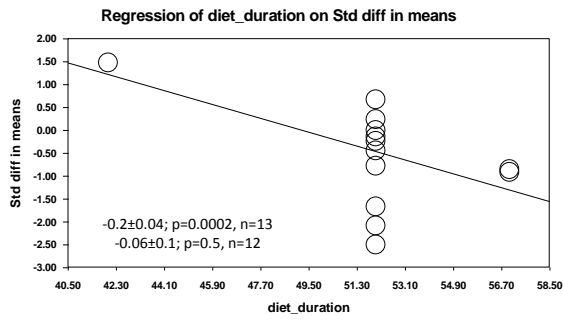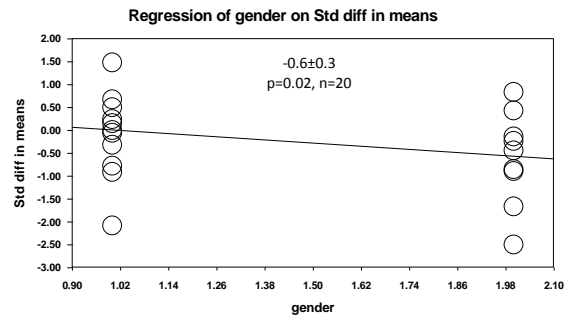

### HDL cholesterol – main dataset

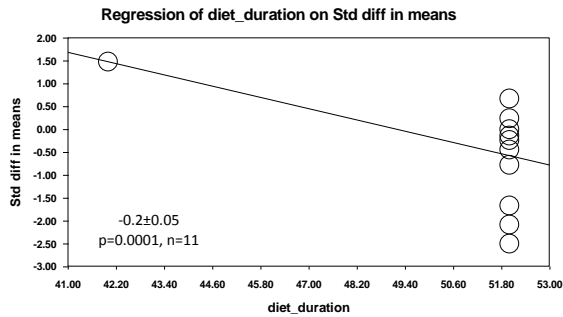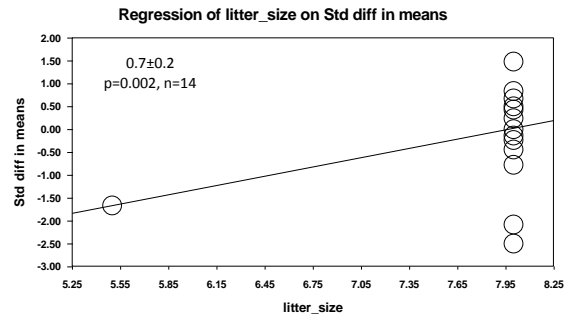

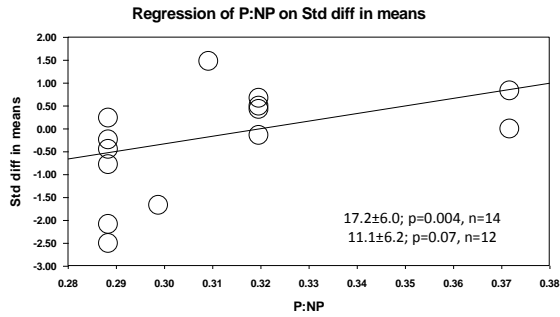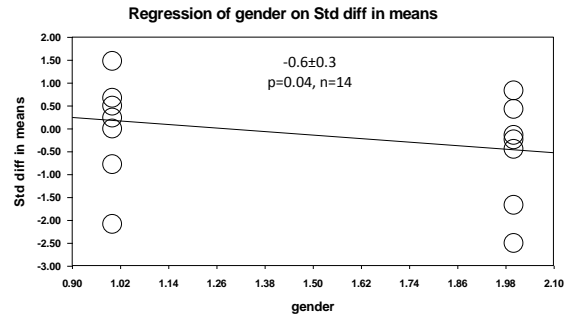

## Triglycerides – extended dataset

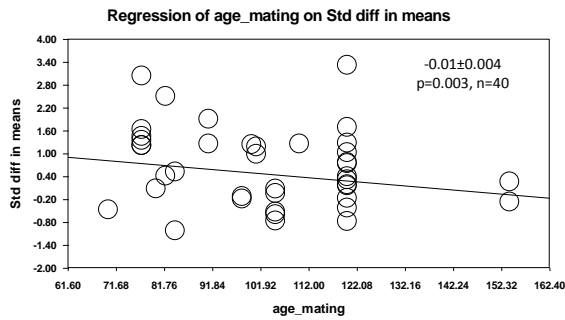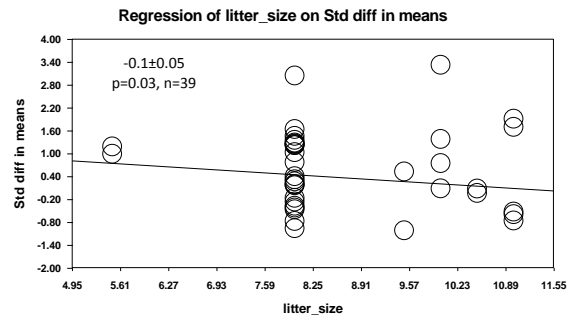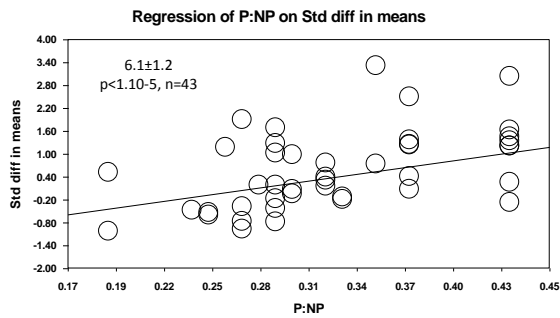

## Triglycerides – main dataset

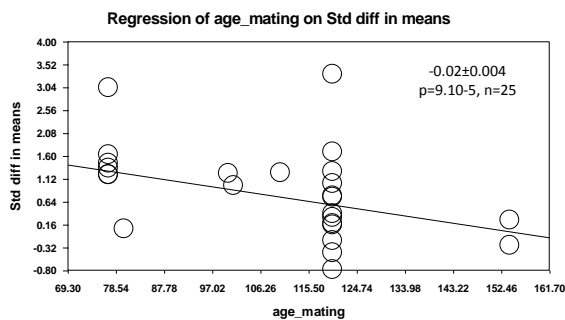

## Systolic Blood Pressure – extended dataset

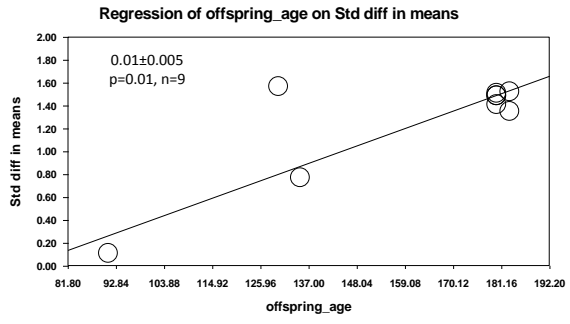

**Supplementary Figure S7:** Funnel plots for the presence of data distribution asymmetry and Egger's test for asymmetry in extended and main datasets.

Data are presented separately for each outcome.

**Body fat** – extended (intercept±ES=4.3±0.7, p-value <0.001) and main (intercept±ES=4.5±0.8, p-value <0.001) datasets.

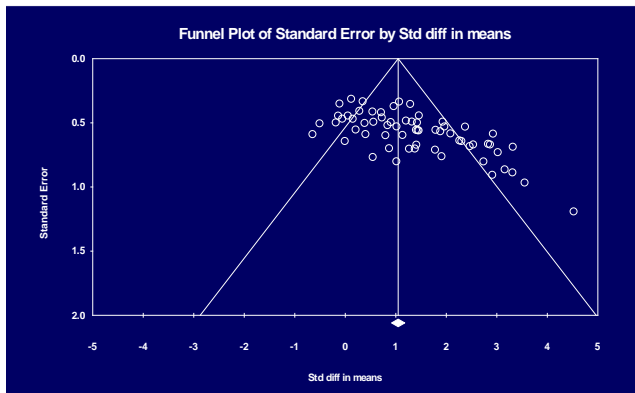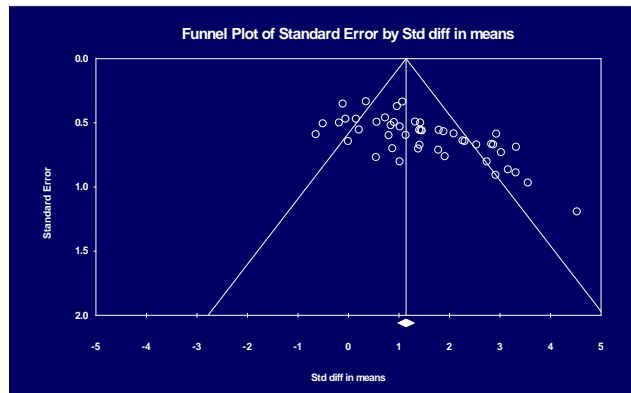

**Body weight** – extended (intercept±ES= 4.0±0.7, p-value<0.001) and main (intercept±ES= 3.4±1.0, p-value=0.001) datasets.

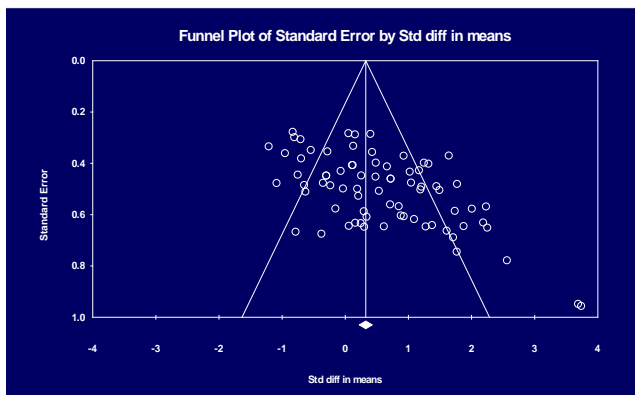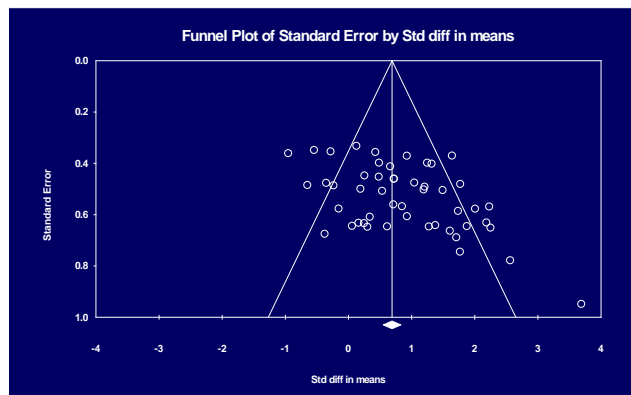

**Leptin** – extended (intercept±ES= 3.3±0.9, p-value=0.001) and main (intercept±ES= 2.9±0.8, p-value=0.002) datasets.

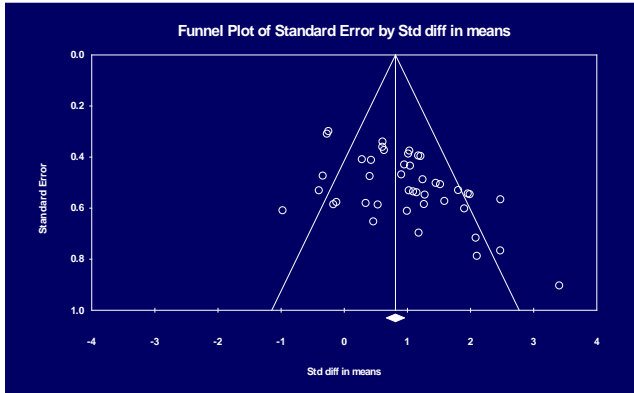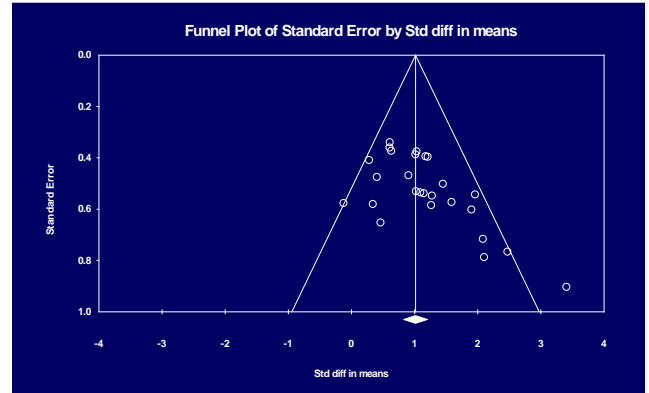

**Glucose** – extended (intercept±ES= 3.4±0.8, p-value <0.001) and main (intercept±ES= 5.4±0.9, p-value <0.001) datasets.

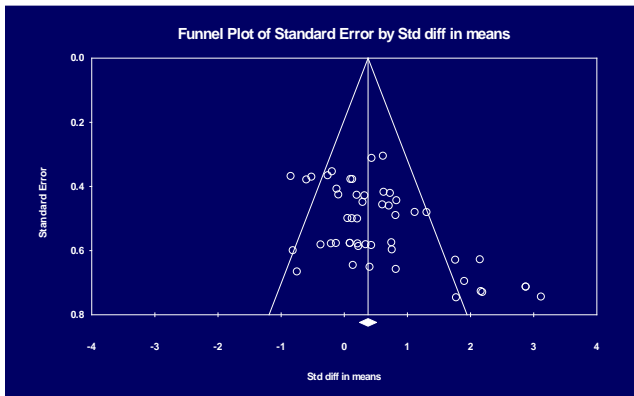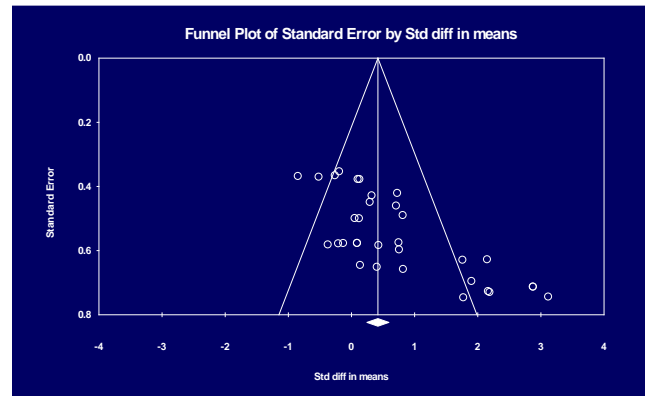

**Insulin** – extended (intercept±ES= 5.0±0.8, p-value <0.001) and main (intercept±ES= 5.3±0.9, p-value <0.001) datasets.

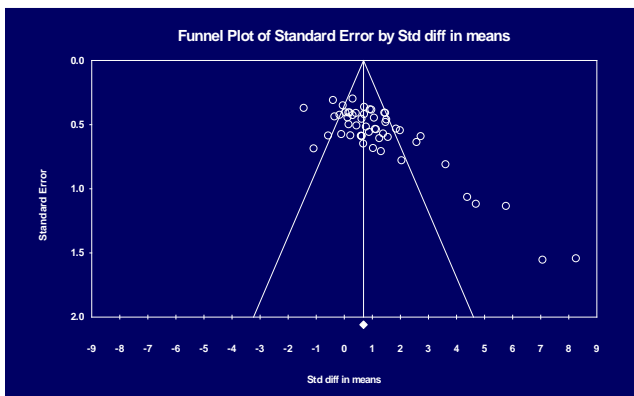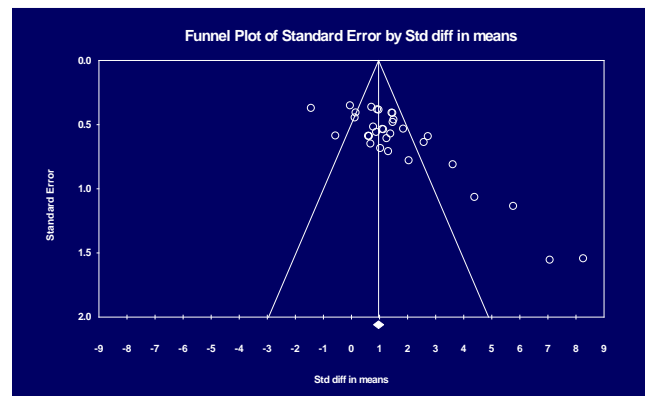

**HDL-c** – extended (intercept±ES= -2.4±2.0, p-value =0.3) and main (intercept±ES= -9.4±4.1, p-value =0.04) datasets.

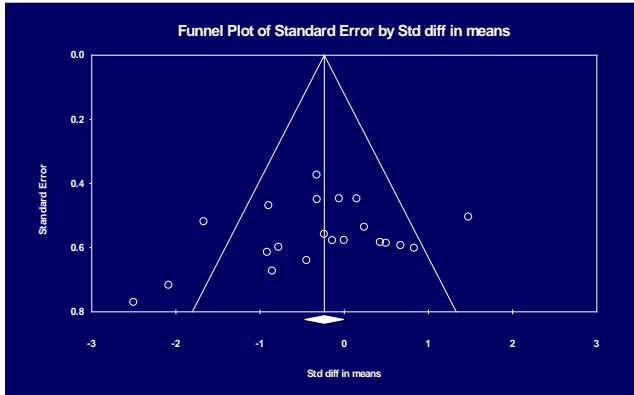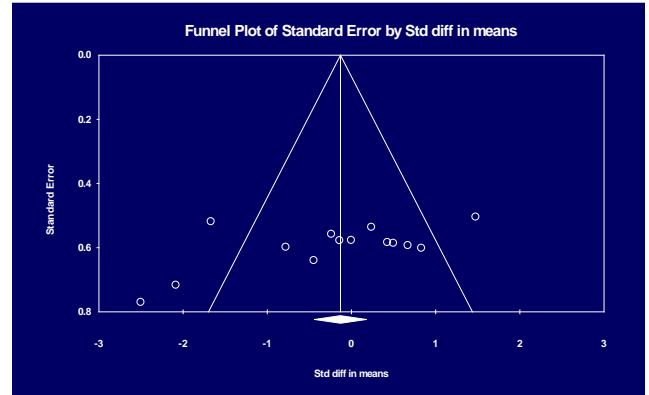

**Triglycerides** – extended (intercept±ES= 4.4±1.0, p-value <0.001) and main (intercept±ES= 4.7±1.3, p-value =0.002) datasets.

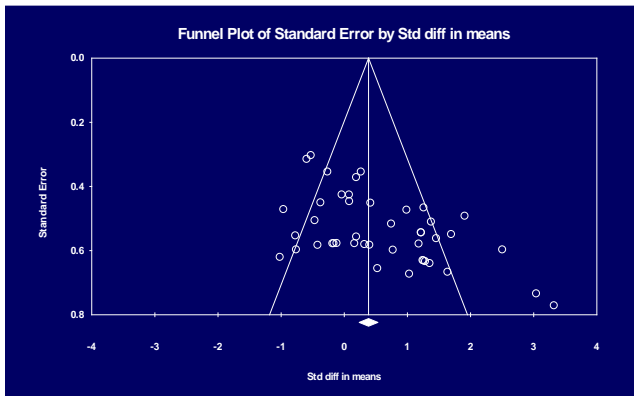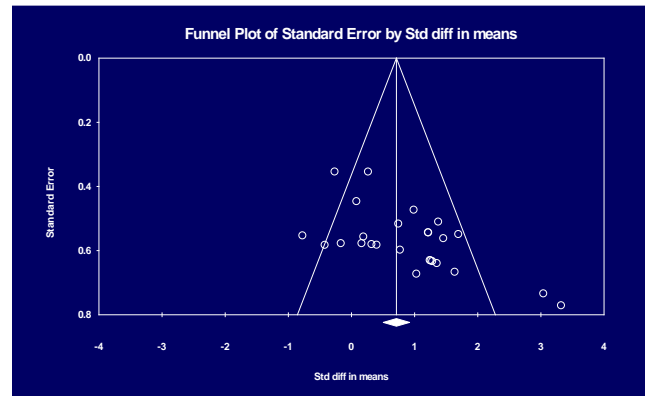

**Systolic Blood Pressure** – extended (intercept±ES= 5.6±1.0, p-value <0.001) and main (intercept±ES= 2.3±1.8, p-value =0.2) datasets.

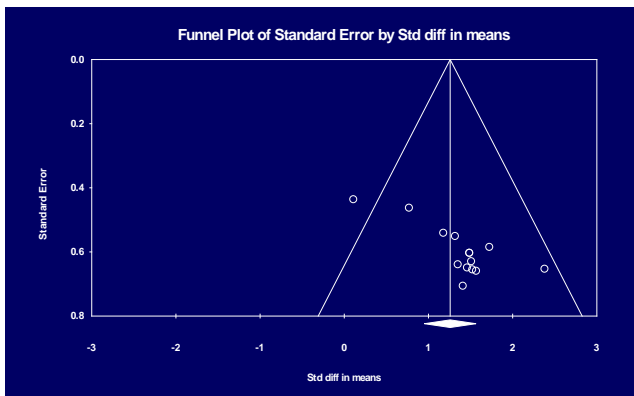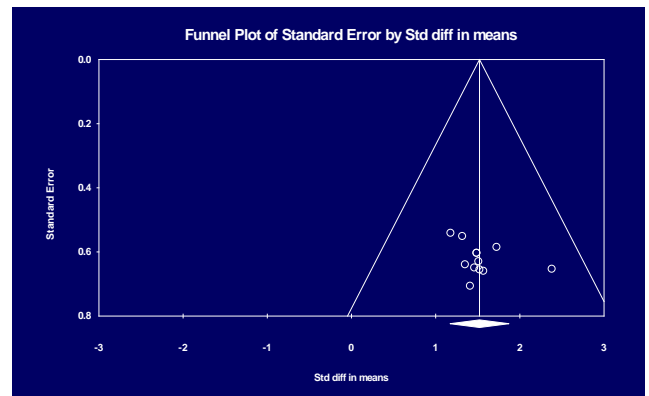

Supplement: 41598_2017_5344_MOESM1_ESM.pdf [file 41598_2017_5344_MOESM1_ESM.pdf]
